# Supplementary material
Source: PubMed Central journal article supplement (PMC6132249)
Supplement: NIHMS985347-supplement-SI.pdf [file NIHMS985347-supplement-SI.pdf]

## **Supporting Information**

**For**

### **Formally Copper(III)-alkylperoxo complexes as models of possible intermediates in monooxygenase enzymes**

Benjamin D. Neisen, Nicole L. Gagnon, Debanjan Dhar, Andrew D. Spaeth, and William B. Tolman\*

Department of Chemistry and Center for Metals in Biocatalysis, University of Minnesota, 207 Pleasant St. SE, Minneapolis, Minnesota, 55455

## Experimental Details

### Materials and Methods

Preparation and handling of the air-sensitive compounds were carried out under a dinitrogen atmosphere either in a glovebox or using standard Schlenk techniques. All reagents and solvents were purchased from commercial sources and used as received unless otherwise noted. Tetrahydrofuran (THF) was dried over sodium/benzophenone and vacuum distilled. Diethyl ether and pentane was passed through solvent purification columns (Glass Contour, Laguna, California). All solvents were stored over 3 Å molecular sieves in a N<sub>2</sub> filled glove-box prior to use. The compounds (H<sub>2</sub>L, L = N,N'-Bis(2,6-diisopropylphenyl)-2,6-pyridinedicarboxamido),<sup>1</sup> [NBu<sub>4</sub>][**1**],<sup>2</sup> ferrocenium tetrakis(3,5-bis(trifluoromethyl)phenyl)borate ([Fc][B(Ar<sup>F</sup>)<sub>4</sub>]),<sup>3</sup> 4-dimethylamino-phenol (<sup>NMe2</sup>PhOH),<sup>4</sup> and 1-hydroxy-2,2,6,6-tetramethyl-piperidine (TEMPO-H)<sup>5</sup> were synthesized by known published procedures. The compound ([NEt<sub>4</sub>][LCu<sup>II</sup>OH], [NEt<sub>4</sub>][**1**]), was prepared using the same procedure as reported for the synthesis of [NBu<sub>4</sub>][**1**],<sup>2</sup> except tetraethylammonium hydroxide was used instead of tetrabutylammonium hydroxide. The 80% cumene hydroperoxide (CmOOH) and 9 M *tert*-butyl-hydroperoxide (*t*BuOOH) in nonane were procured from Sigma Aldrich Chemical Co. <sup>18</sup>O-enriched cumene hydroperoxide (~ 60% <sup>18</sup>O incorporation by ESI-MS) was synthesized by using cumene and <sup>18</sup>O<sub>2</sub> (procured from ICON isotopes) according to a literature procedure.<sup>6</sup> Decamethylferrocene (Fc\*) was procured from Sigma-Aldrich.

UV-vis spectra were collected on a HP8453 (190-1100nm) diode array spectrophotometer. Low-temperature UV-vis experiments were performed using a Unisoku low-temp UV-vis cell holder. EPR data was collected on a Bruker Elexsys E500 spectrophotometer using X-band radiation at 35 dB or 55 dB and 30 K. EPR spectral simulations were performed using EasySpin software (version 4.5.5).<sup>7</sup> Cyclic voltammograms were recorded using an EC Epsilon potentiostat from BASi, a platinum working electrode, and an AgNO<sub>3</sub>/Ag reference electrode. All cyclic voltammograms were internally referenced using Fc\* and then the potentials converted with respect to the standard Fc<sup>+</sup>/Fc couple.<sup>8</sup> X-ray diffraction measurements were collected with a Cu Kα radiation and a Bruker D8 Photon II CPAD diffractometer using normal parabolic mirrors as monochromators. Resonance Raman (rR) spectra were collected on an Acton 506 spectrometer using a Princeton Instruments LN/CCD-11100-PB/UBAR detector and ST-1385 controller interfaced with *Winspec* software. The spectra were obtained at 77 K using a backscattering geometry. Excitation at 561 nm was provided by a Cobalt Jive 100 mW laser. Raman shifts were externally referenced to indene and internally referenced to solvent (THF). Spectra were baseline corrected and normalized to solvent using *Origin* (2016) software. Hooke's law was used to determine the force constant (*k*) and the expected shift upon isotopic labeling:

$$\nu = \frac{1}{2\pi} \sqrt{\frac{k}{\mu}} \Rightarrow k = \mu(2\pi\nu)^2 \quad (1)$$

$$\mu = \frac{m_1 m_2}{m_1 + m_2} \quad (2)$$

where  $\nu$  is the stretching frequency (in Hz),  $\mu$  is the reduced mass (in kg), and  $m_1$  and  $m_2$  are the masses of the atoms involved in the vibration (in kg).<sup>9</sup> The final units of  $k$  are N m<sup>-1</sup>, which are converted to mdyn Å<sup>-1</sup> by dividing by 100.

### Preparation of compounds:

([NBu<sub>4</sub>][LCu<sup>II</sup>OOCm], [NBu<sub>4</sub>][2a]). To a 25 mL Schleck flask, 200 mg (0.25 mmol) of solid [NBu<sub>4</sub>][1] was added along with activated 3 Å molecular sieves and placed under Argon atmosphere. To this flask 10 mL of anhydrous THF was added, which resulted in dissolution of the [NBu<sub>4</sub>][1] to give a blue solution. After stirring the solution for 30 min, it was cooled to -20 °C using a salt/ice bath and 0.1 mL of an 80% solution (5 equiv.) of cumene hydroperoxide was added dropwise resulting in a color change from blue to a dark crimson. After stirring for 15 min., the reaction mixture was syringe-filtered using a 25 mM diameter, 0.2 μm hydrophobic polytetrafluoroethylene (PTFE) syringe filter, into a separate dry, flask to remove all molecular sieve particulate. The solvent was removed from the reaction solution *in vacuo* while at -20 °C and the resulting crimson oil was subsequently dissolved in minimal anhydrous diethyl ether (Et<sub>2</sub>O, ~ 5.0 mL) and triturated with pentane 3x until a more powdery product was obtained. The product was then stirred over 10 mL of anhydrous pentane for 12 hours and filtered using a frit funnel to give a crimson colored solid that was washed with pentane 3x and dried on a vacuum line (160 mg, 68% yield). UV-vis (THF, -80 °C) λ<sub>max</sub>, nm (ε, M<sup>-1</sup> cm<sup>-1</sup>): 552 (380), 698 (130). HR-MS (ESI, MeCN) *m/z*: **2a** Calcd. for [C<sub>40</sub>H<sub>48</sub>CuN<sub>3</sub>O<sub>4</sub>]<sup>-</sup> 697.294; found 697.208. Repeated attempts to obtain correct CHN analysis were unsuccessful with consistently low carbon composition in the analyses, which we attribute to incomplete combustion. The compound [NEt<sub>4</sub>][2a] was prepared specifically for crystallization purposes using the analogous synthetic procedure for compound [NBu<sub>4</sub>][2a] but using [NEt<sub>4</sub>][1] as a precursor in lieu of [NBu<sub>4</sub>][1]. X-ray quality crystals were formed from the crude reaction mixture after being subjected to vacuum over a 12 hour period.

([NBu<sub>4</sub>][LCu<sup>II</sup>OOC*t*Bu], [NBu<sub>4</sub>][2b]). The analogous synthetic method for [NBu<sub>4</sub>][2a] was used except *tert*-butyl-hydroperoxide in nonane was used to give [NBu<sub>4</sub>][2b] (190 mg, 81% yield). UV-vis (THF, -80 °C) λ<sub>max</sub>, nm (ε, M<sup>-1</sup> cm<sup>-1</sup>): 551 (450), 694 (135). HR-MS (ESI, MeCN) *m/z*: **2b** Calcd. for [C<sub>35</sub>H<sub>46</sub>CuN<sub>3</sub>O<sub>4</sub>]<sup>-</sup> 635.278; found 635.270. Repeated attempts to obtain correct CHN analysis were unsuccessful, which we attribute to incomplete combustion. Compound [NEt<sub>4</sub>][2b] was prepared specifically for crystallization purposes using the analogous synthetic procedure for compound [NBu<sub>4</sub>][2b] but using [NEt<sub>4</sub>][1] as a precursor in lieu of [NBu<sub>4</sub>][1]. X-ray quality crystals were formed by the slow evaporation of pentane solvent into a concentrated THF solution of [NEt<sub>4</sub>][2b] in a -20 °C freezer.

([NBu<sub>4</sub>][LCu<sup>II</sup>OPh<sup>NMe<sub>2</sub></sup>], [NBu<sub>4</sub>][5]). Solid [NBu<sub>4</sub>][1] (150 mg, 0.186 mmol) and 38 mg (0.279 mmol) of 4-dimethylamino-phenol was mixed along with activated 3 Å molecular sieves in a 20 ml vial inside a N<sub>2</sub> filled dry box. To this mixture 10 mL of anhydrous THF was added, which resulted in the immediate formation of a deep purple solution. After stirring for 30 min. the reaction mixture was syringe-filtered using a 25 mM diameter, 0.2 μm hydrophobic polytetrafluoroethylene (PTFE) syringe filter, into a separate vial to remove all the molecular sieve particulate. The residual pulverized sieves were rinsed with anhydrous THF (3 x 2 mL) to extract all adhered compound and the resulting solution was syringe-filtered analogously and combined with the original filtrate. The combined solution was then concentrated *in vacuo* to ~ 2 mL and to the resulting solution excess diethyl ether (Et<sub>2</sub>O, ~ 15 mL) was added and the mixture was stirred vigorously. The fine solid that precipitated out was isolated by filtration on a fine-pore size frit and washed with copious amounts of Et<sub>2</sub>O and dried thoroughly to yield a deep

purple colored solid (155 mg, 90 %). UV-vis (THF, -80 °C)  $\lambda_{\text{max}}$ , nm ( $\epsilon$ ,  $\text{M}^{-1} \text{cm}^{-1}$ ): 462 (1,000), 533 (1,100), 726 (570). HR-MS (ESI, MeCN)  $m/z$ : **5** Calcd. for  $[\text{C}_{39}\text{H}_{47}\text{CuN}_4\text{O}_3]^-$  682.294; found 682.187.

**Electrospray Ionization Mass Spectrometry (ESI-MS) of 2a, 2b, 5 and  $^{18}\text{O}$ -labeled 2a.** A 1 mL aliquot of a 1 mM THF solution of **2a** or **2b** was injected into a electrospray ionization source and analyzed. Additionally, a Polyethylene Glycol (PEG) standard was injected along with analyte and the corresponding mass/charge signals were corrected based on the known masses of the PEG standard.

For the  $^{18}\text{O}$ -labeled **2a** sample only low resolution ESI-MS data was obtained. A 1 mL aliquot of the 2 mM THF solution was injected into an electrospray ionization source and analyzed. Incorporation of  $^{18}\text{O}$  in the complex was determined by the relative peak heights of the feature at  $m/z = 697$  and  $m/z = 701$  using equation 3

$$\%^{18}\text{O incorporation} = 100\% * \left( \frac{(M_{701b} - M_{701a})}{((M_{701b} - M_{701a}) + M_{697})} \right) \quad (3)$$

where  $M_{701b}$  is the total peak height at  $m/z = 701$ ,  $M_{701a}$  is the predicted contribution to the  $m/z = 701$  feature due to naturally occurring isotopes of the unlabeled complex and  $M_{697}$  is the total peak height of the feature at  $m/z = 697$ .

**Oxidation Reactions.** A necked 1 cm UV-vis cuvette in the Unisoku low-temp UV-vis cell holder containing 1.8 mL of THF and a stir bar was cooled to -80 °C. To this cell, 0.1 mL of a 2 mM THF solution of  $[\text{NBu}_4][\mathbf{2a}]$ ,  $[\text{NBu}_4][\mathbf{2b}]$ , or  $[\text{NBu}_4][\mathbf{5}]$  was added. After mixing and allowing for temperature stabilization (5 min), a UV-vis spectrum was recorded. To the stirring mixture, 0.1 mL of a 2 mM solution of  $[\text{Fc}][\text{B}(\text{Ar}^{\text{F}})_4]$  was injected and stirred. The spectrum was immediately recorded upon addition of oxidant. EPR samples were prepared by injecting a 0.15 mL aliquot of a 2 mM THF solution of  $[\text{NBu}_4][\mathbf{2a}]$  or  $[\text{NBu}_4][\mathbf{2b}]$  to a quartz EPR sample tube and cooling to  $\sim -80$  °C using a liquid  $\text{N}_2$ /acetone bath. To this cooled tube a 0.15 mL aliquot of a 2 mM THF solution of  $[\text{Fc}][\text{B}(\text{Ar}^{\text{F}})_4]$  was added, mixed using the tip of the syringe needle, and then immediately frozen in liquid nitrogen for storage and analysis.

**Preparation of resonance Raman samples of  $[\text{NBu}_4][\mathbf{2a}]$ .** To a dry schlenk flask with 3 Å mol. sieves, 40.3 mg of  $[\text{NBu}_4][\mathbf{1}]$  was added and dissolved in 4.9 mL of anhydrous THF. The blue reaction solution was cooled to -20 °C using a salt/ice bath and 0.1 mL of cumene hydroperoxide in cumene or  $^{18}\text{O}$  enriched cumene hydroperoxide in cumene was added, producing a color change from blue to light crimson. This mixture was allowed to stir for 20 min. and then a 0.15 mL aliquot was injected into a septa covered quartz EPR sample tube under dry  $\text{N}_2$  atmosphere and cooled to  $\sim -80$  °C using a liquid  $\text{N}_2$ /acetone bath. To this cooled tube a 0.15 mL aliquot of a 10 mM THF solution of  $[\text{Fc}][\text{B}(\text{Ar}^{\text{F}})_4]$ , was added, mixed using the tip of the syringe needle and then immediately frozen in liquid nitrogen for storage and analysis.

**Oxidation titration of  $[\text{NBu}_4][\mathbf{2a}]$ .** To a cuvette with 1.8 mL of THF and a stir bar in the Unisoku low temperature cell holder at -80 °C was added 0.1 mL of a stock solution of  $[\text{NBu}_4][\mathbf{2a}]$  (2 mM). After temperature equilibration (10 min), 0.1 mL of THF solutions  $[\text{Fc}][\text{B}(\text{Ar}^{\text{F}})_4]$  of varying concentration (corresponding to 0.0–2.0 equivalents) were added and the UV-vis spectra were recorded. This was repeated 11 times, where one titration data point corresponds to a single reaction with specific equivalent amount of  $[\text{Fc}][\text{B}(\text{Ar}^{\text{F}})_4]$  (Figure S10).

**Reversible oxidation/reduction of [NBu<sub>4</sub>][2a].** To a cuvette with 1.8 mL of THF and a stir bar in the Unisoku low temperature cell holder at -80 °C was added 0.1 mL of a stock solution of [NBu<sub>4</sub>][2a] (2 mM). After temperature equilibration (10 min), 0.1 mL of a 2 mM solution of [Fc][B(Ar<sup>F</sup>)<sub>4</sub>] was injected and stirred and the spectrum immediately recorded. To this oxidized solution, 0.1 mL of a 2 mM solution of Fc\* was added and the resulting spectrum recorded. The addition of 0.1 mL of [Fc][B(Ar<sup>F</sup>)<sub>4</sub>] (oxidant) and Fc\* (reductant) was repeated with spectra taken after each addition. The UV-vis spectra shown in Figure S11 were corrected for concentration as a function of volume change due to addition of reagents.

**Kinetics analysis of the reactions of 3a.** A necked 1 cm UV-vis cuvette in the Unisoku low-temp UV-vis cell holder, containing 1.7 mL of THF was cooled to -80 °C or -25 °C respectively. To this cell 0.1 mL of a 2 mM THF solution of [NBu<sub>4</sub>][2a] was added. Continuous collection of the UV-vis absorption spectrum was initiated as soon as 0.1 mL of a 2 mM solution of [Fc][B(Ar<sup>F</sup>)<sub>4</sub>] was injected to the mixture. Upon observation of the full growth of the oxidized feature of 3a, 0.1 mL of a solution of the desired substrate was added to the cell. The decay of 3a was monitored until no changes to the UV-vis spectrum could be detected. The single wavelength kinetic trace was determined by the disappearance of the UV-vis feature due to 3a at 504 nm. The pseudo first order rate constants, *k*<sub>obs</sub>, were determined from the decay of 3a as a function of time. Second order rate constants for TEMPO-H reactions were approximated by producing a linear fit using the plot of *k*<sub>obs</sub> vs. [TEMPO-H] and obtaining the second order rate constant from the slope of the linear fit of this data (Figure S25).

**Theoretical Methods.** Density Functional Theory (DFT) calculations were performed using the *ORCA* (v.3.0.2) program.<sup>10</sup> Starting geometries for copper-alkylperoxo complexes were based on the respective X-ray crystal structures. Complexes were optimized spin-unrestricted (UKS) using the *mPWPW* functional with a Def2-QZVP basis set on Cu and other atoms set to a Def2-TZVP basis set, the Resolution of Identity (RI) approximation, Def2-TZV/J auxiliary basis set, tight SCF convergence (VeryTightSCF), and a large integration grid (Grid6).<sup>11-13</sup> The *mPWPW* functional was previously shown to give acceptable geometries for copper-oxygen complexes.<sup>14</sup> Numerical frequency calculations on all complexes confirmed stable structures with no imaginary frequencies observed. A comparison of the bond metrics for the DFT optimized structures with the crystal structures is shown in Table S2. To determine the O-O vibration, the generated Hessian file was rerun through the '*orca\_vib*' program where the mass of oxygen was changed to 18 amu, as documented in the *ORCA* manual. Large shifts in energy were used to assign the stretching vibration, which was confirmed upon visualization of the highly-coupled vibration, see video in Supporting Information.

Spin density plots for 2a and b were generated from single point calculations using the BP86 functional<sup>15</sup> with the 'Partridge-3' basis set,<sup>16</sup> the RI approximation, and a TZV/J auxiliary basis set, as used previously.<sup>17</sup> Broken-symmetry calculations were computed using the 'Flipspin' command on the Cu atom starting from the singlet or triplet state geometries with the same basis set mentioned above using a range of functionals: *mPWPW*,<sup>11</sup> BP86,<sup>15</sup> OLYP,<sup>18</sup> TPSS,<sup>19</sup> M06-L,<sup>20</sup> B3LYP,<sup>21</sup> PBE0,<sup>22</sup> TPSSh,<sup>23</sup> M06,<sup>24</sup> PW6B95,<sup>25</sup> and M06-2X.<sup>24</sup> Hybrid- and meta-hybrid-GGA functionals additionally used the Resolution of Identity – Chain of Spheres (RIJCOSX) approximation with an elevated COSX integration grid (GridX4).<sup>26</sup> The 'double-hybrid' functional PWPB95<sup>27</sup> was utilized (including the RIJK approximation with Def2-TZVP/JK and Def2-TZVP/C auxiliary basis sets using a frozen core) by running single-point energy calculations on the triplet state optimized geometry and the broken-symmetry solution from the

PBE0 calculation. The singlet-triplet energy gaps were ‘spin purified’ by the following, equation 4,<sup>28</sup>

$$E_S = E_T - 2 \left[ \frac{E_T - E_{BS}}{2 - \langle S_{BS}^2 \rangle} \right] \quad (4)$$

where  $E_T$ ,  $E_S$ , and  $E_{BS}$  are the electronic energies of the triplet, singlet, and broken-symmetry singlet states, respectively, and  $\langle S_{BS}^2 \rangle$  is the expectation value of the spin operator from the broken-symmetry singlet state. Time-dependent DFT (TD-DFT) calculations were performed with the PBE0 functional, Def2-TZVP basis set, Def2-SVP/J auxiliary basis set, the Zero-Order Regular Approximation (ZORA)<sup>29</sup> for Cu, RIJCOSX, Grid4, TightSCF, and the Tamm-Dancoff approximation<sup>30</sup> for 40 excited states. Surface contour plots were generated using the *Molekel* (v.5.4.0.8) program with isodensity values set to  $\pm 0.003$  for spin density plots,  $\pm 0.002$  for TD-DFT difference plots and  $\pm 0.02$  for Kohn-Sham molecular orbitals.<sup>31</sup> The programs *Avogadro* (v.1.2.0) and *Gabedit* (v.2.4.8) were also utilized.<sup>32,33</sup>

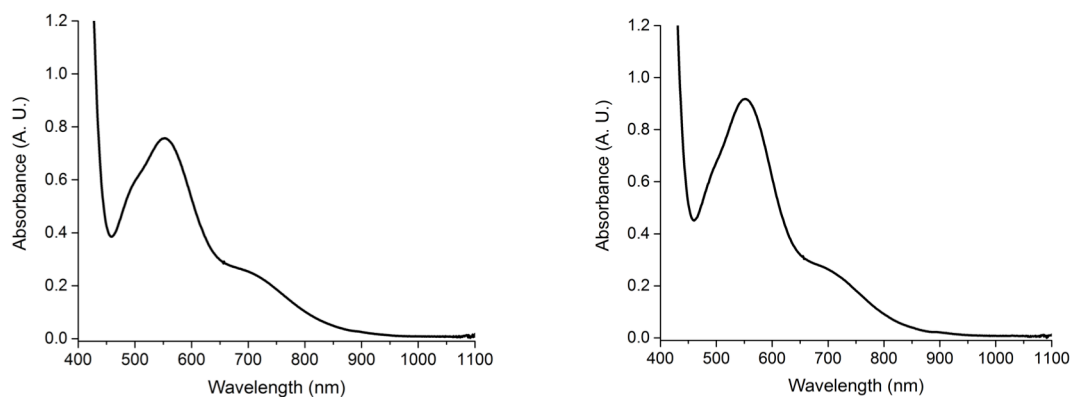

**Figure S1.** UV-visible spectra of  $[\text{NBu}_4][\mathbf{2a}]$  (left) and  $[\text{NBu}_4][\mathbf{2b}]$  (right) in THF at  $-80\text{ }^\circ\text{C}$  (2 mM).

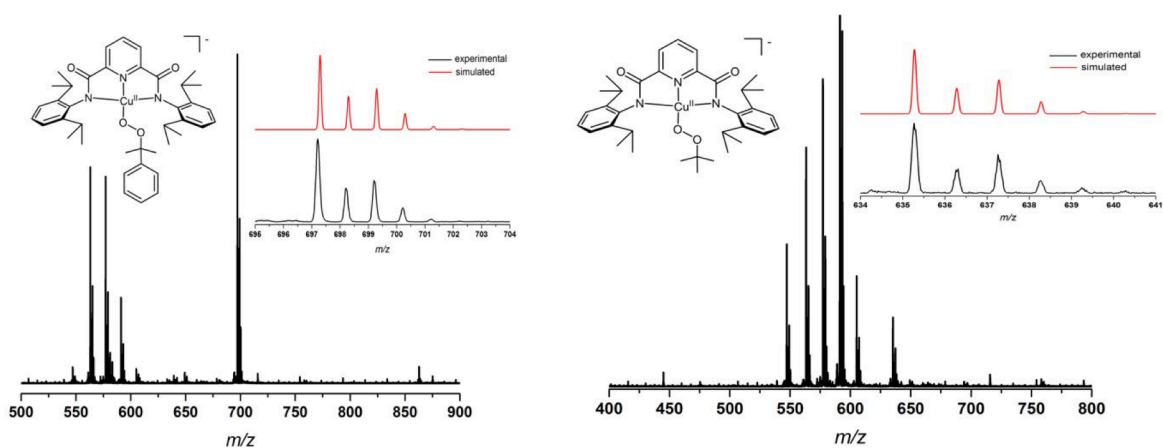

**Figure S2.** Negative mode high resolution ESI-MS of  $[\text{NBu}_4][\mathbf{2a}]$  (left) and  $[\text{NBu}_4][\mathbf{2b}]$  (right), with simulated isotopic patterns for the parent ions compared to the experimental data as insets.

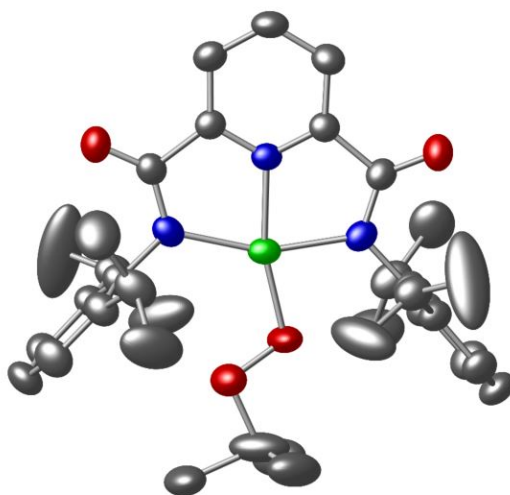

**Figure S3.** Representation of the X-ray crystal structure of  $\mathbf{2b}$  anion, shown as 50% thermal ellipsoids (H atoms and disordered component of  $-\text{OOTBu}$  group omitted for clarity). For details, including interatomic distances and angles, see the CIF.

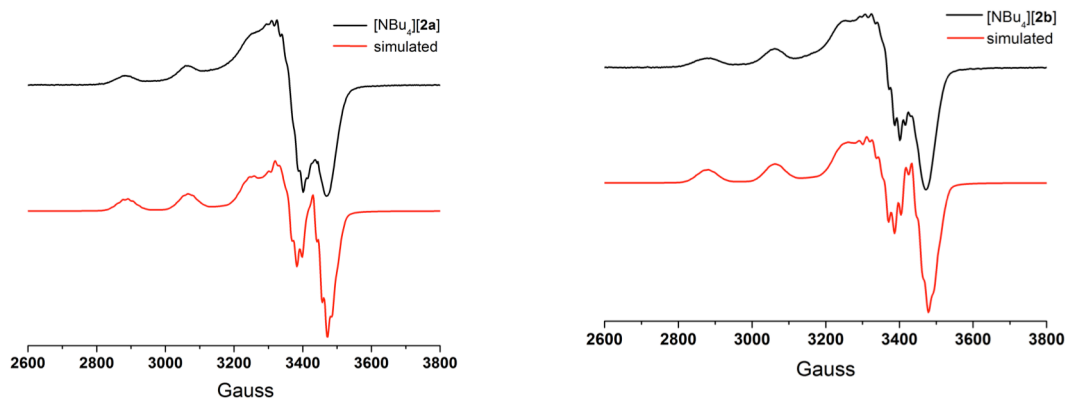

**Figure S4.** Continuous wave X-band (9.64 GHz) EPR spectra of  $[\text{NBu}_4][\mathbf{2a}]$  and  $[\text{NBu}_4][\mathbf{2b}]$  with their respective simulated spectra in THF at 30 K and 35 dB.

**Table S1.** EPR parameters from spectral simulations.

| Compound           | $[\text{NBu}_4][\mathbf{1}]^2$ | $[\text{NBu}_4][\mathbf{2a}]$ | $[\text{NBu}_4][\mathbf{2b}]$ |
|--------------------|--------------------------------|-------------------------------|-------------------------------|
| $g(x)$             | 2.026                          | 2.044                         | 2.042                         |
| $g(y)$             | 2.047                          | 2.041                         | 2.042                         |
| $g(z)$             | 2.194                          | 2.183                         | 2.185                         |
| $A^{\text{Cu}}(x)$ | 57                             | 45                            | 60                            |
| $A^{\text{Cu}}(y)$ | 57                             | 45                            | 60                            |
| $A^{\text{Cu}}(z)$ | 567                            | 535                           | 550                           |
| $A^{\text{Py}}(x)$ | 30                             | 40                            | 55                            |
| $A^{\text{Py}}(y)$ | 50                             | 40                            | 55                            |
| $A^{\text{Py}}(z)$ | 30                             | 50                            | 50                            |
| $A^{\text{am}}(x)$ | 32                             | 45                            | 45                            |
| $A^{\text{am}}(y)$ | 50                             | 50                            | 45                            |
| $A^{\text{am}}(z)$ | 30                             | 45                            | 45                            |



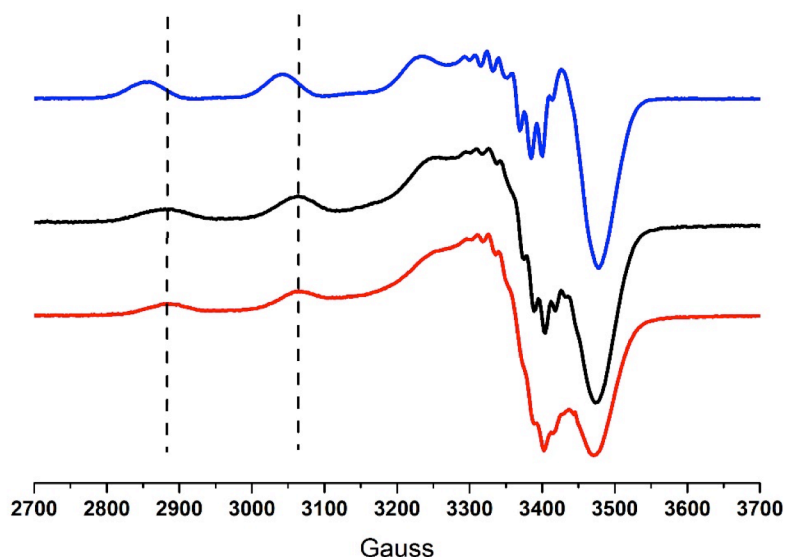

**Figure S5.** Continuous wave X-band (9.64 GHz) EPR spectra of  $[\text{NBu}_4][\mathbf{1}]$  (blue),  $[\text{NBu}_4][\mathbf{2a}]$  (black), and  $[\text{NBu}_4][\mathbf{2b}]$  (red) in THF at 30 K and 35 dB, with the dashed lines highlighting key spectroscopic differences between  $[\text{NBu}_4][\mathbf{1}]$  and the alkyperoxo

**Table S2.** Geometric parameters compared between XRD data and DFT optimized structures.

| Complex                  | $[\mathbf{2a}][\text{NEt}_4]$ | $[\mathbf{2a}][\text{NEt}_4]$ | $[\mathbf{2a}]^-$ | $\mathbf{3a}$ | $\mathbf{3a}$ | $[\mathbf{2b}][\text{NEt}_4]$ | $[\mathbf{2b}]^-$ | $\mathbf{3b}$ | $\mathbf{3b}$ |       |
|--------------------------|-------------------------------|-------------------------------|-------------------|---------------|---------------|-------------------------------|-------------------|---------------|---------------|-------|
| Method <sup>a</sup>      | XRD                           | XRD                           | DFT               | DFT (S)       | DFT (T)       | XRD                           | DFT               | DFT (S)       | DFT (T)       |       |
| <b>Bond Length (Å)</b>   | <b>Cu-O</b>                   | 1.8410(14)                    | 1.8240(17)        | 1.881         | 1.860         | 1.929                         | 1.855(4)          | 1.874         | 1.856         | 1.923 |
|                          | <b>Cu-N<sub>py</sub></b>      | 1.9336(15)                    | 1.9303(16)        | 1.964         | 1.911         | 1.961                         | 1.931(2)          | 1.960         | 1.908         | 1.958 |
|                          | <b>Cu-N<sub>am</sub></b>      | 2.0194(15)                    | 2.0171(15)        | 2.095         | 2.006         | 2.059                         | 2.0073(19)        | 2.101         | 1.995         | 2.058 |
|                          | <b>Cu-N<sub>am</sub></b>      | 2.0258(15)                    | 2.0260(16)        | 2.115         | 1.995         | 2.053                         | 2.0074(19)        | 2.110         | 2.001         | 2.044 |
|                          | <b>O-O</b>                    | 1.4689(19)                    | 1.469(2)          | 1.449         | 1.407         | 1.364                         | 1.416(6)          | 1.449         | 1.405         | 1.363 |
|                          | <b>O-C</b>                    | 1.433(3)                      | 1.414(3)          | 1.461         | 1.493         | 1.523                         | 1.524(6)          | 1.452         | 1.482         | 1.507 |
| <b>Torsion Angle (°)</b> | <b>N<sub>am</sub>-Cu-O-O</b>  | 22.93(15)                     | 10.6(2)           | 9             | 4             | 80                            | 6.32              | 5             | 3             | 63    |
|                          | <b>Cu-O-O-C</b>               | 150.04(14)                    | 169.60(18)        | 129           | 127           | 175                           | 179.61            | 136           | 128           | 178   |
| $\tau_4^b$               | 0.22                          | 0.22                          | 0.29              | 0.24          | 0.23          | 0.25                          | 0.28              | 0.23          | 0.23          |       |
| <b>BVS<sup>c</sup></b>   | 2.2                           | 2.3                           | 1.9               | 2.5           | 2.1           | 2.2                           | 1.9               | 2.5           | 2.1           |       |

<sup>a</sup> X-ray Diffraction (XRD) structures with estimated standard deviations shown in parentheses where there are two independent molecules in the asymmetric unit for  $[\mathbf{2a}][\text{NEt}_4]$ , and Density Functional Theory (DFT) structures calculated at the *m*PWPW / Def2-TZVP | Def2-QZVP(Cu) level where (S) is singlet state and (T) is triplet state. <sup>b</sup>  $\tau_4$  value where 0 = square planar and 1 = tetrahedral geometries about the copper.<sup>34</sup> <sup>c</sup> Bond Valance Sum (BVS) analysis to approximate

the oxidation state of the copper for structures **2a,b** [ $B = 0.37$ ;  $R_0$  is 1.679 (Cu<sup>II</sup>-O) and 1.751 (Cu<sup>II</sup>-N)] and **3a,b** [ $B = 0.37$ ;  $R_0$  is 1.735 (Cu<sup>III</sup>-O) and 1.768 (Cu<sup>III</sup>-N)].<sup>35</sup>

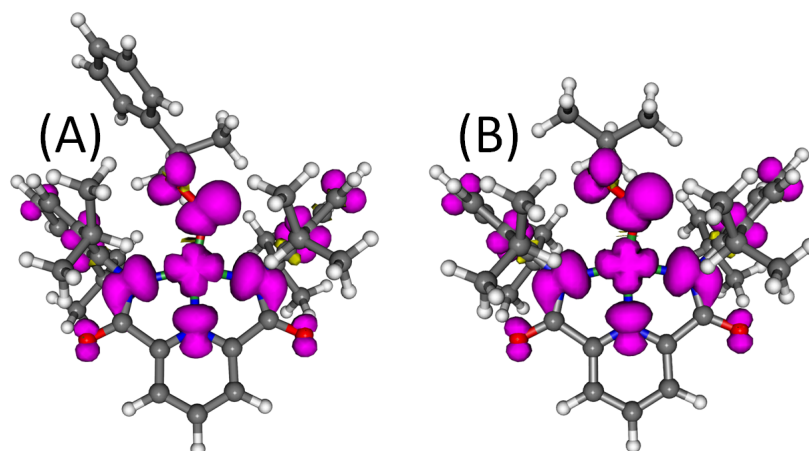

**Figure S6.** Spin density plots (pink is positive density, yellow is negative density) of [CuOOR]<sup>+</sup> for [(A) R = cumyl [**2a**]; (B) R = tBu [**2b**], right) using BP86/Partridge-3 level of theory where gray, white, blue, red, and green atoms represent C, H, N, O, and Cu, respectively.

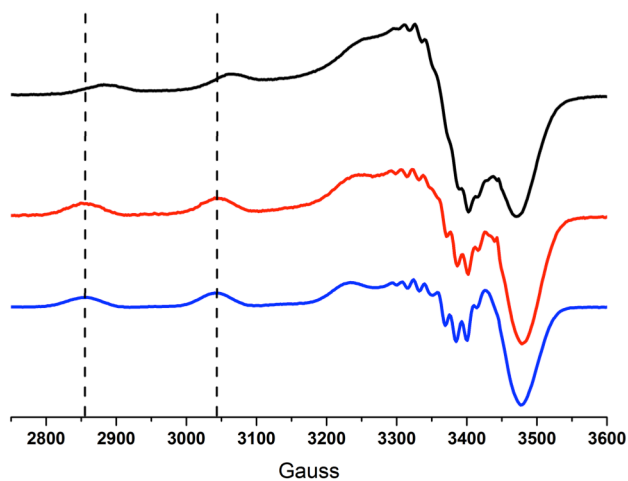

**Figure S7.** Continuous wave X-band (9.64 GHz) EPR spectra of [NBu<sub>4</sub>][**2a**] (black), [NBu<sub>4</sub>][**2a**] decay product (red), and [NBu<sub>4</sub>][**1**] (blue) in THF at 30 K and 35 dB.

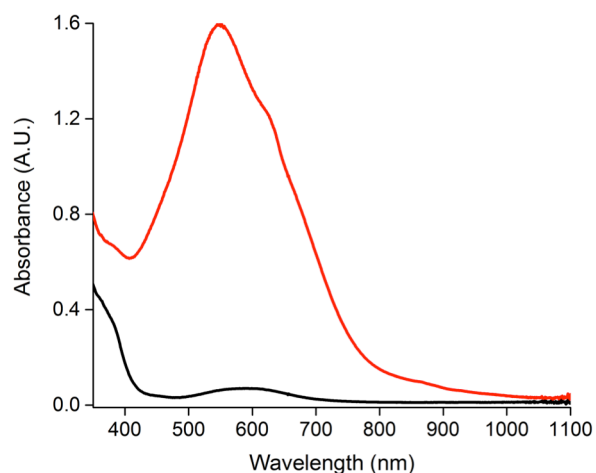

**Figure S8.** UV-vis spectra of  $[\text{NBu}_4][\mathbf{2a}]$  decay product ( $\sim 0.1$  mM) (black), and the product of reaction of that decay product with an equiv. of  $[\text{Fc}][\text{B}(\text{Ar}^{\text{F}})_4]$  (red) in THF at  $-80$  °C. This latter spectrum matches that reported previously for  $\text{LCuOH}$ .

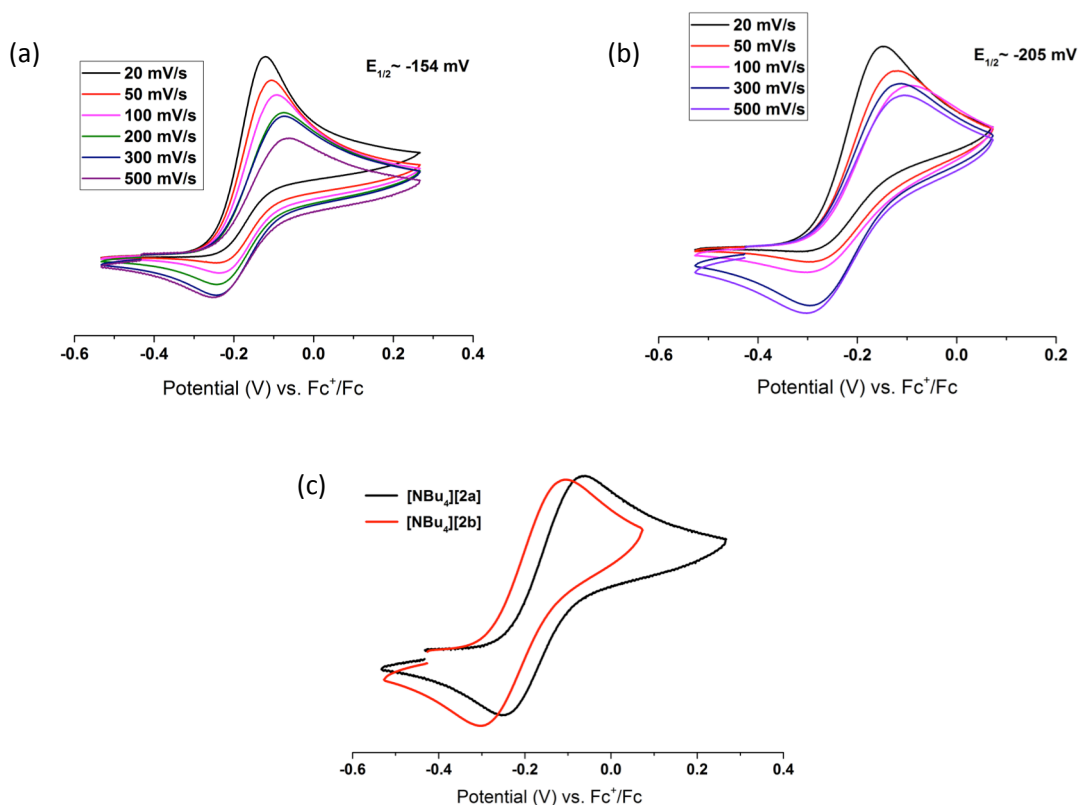

**Figure S9.** Scan rate normalized (where current is divided by square root of scan rate) cyclic voltammograms of (a)  $[\text{NBu}_4][\mathbf{2a}]$ , (b)  $[\text{NBu}_4][\mathbf{2b}]$  and (c) overlaid voltammograms of  $[\text{NBu}_4][\mathbf{2a}]$  and  $[\text{NBu}_4][\mathbf{2b}]$  at 500 mV/s scan rate in 0.3 M  $\text{NBu}_4\text{PF}_6$  THF solution at room temperature.

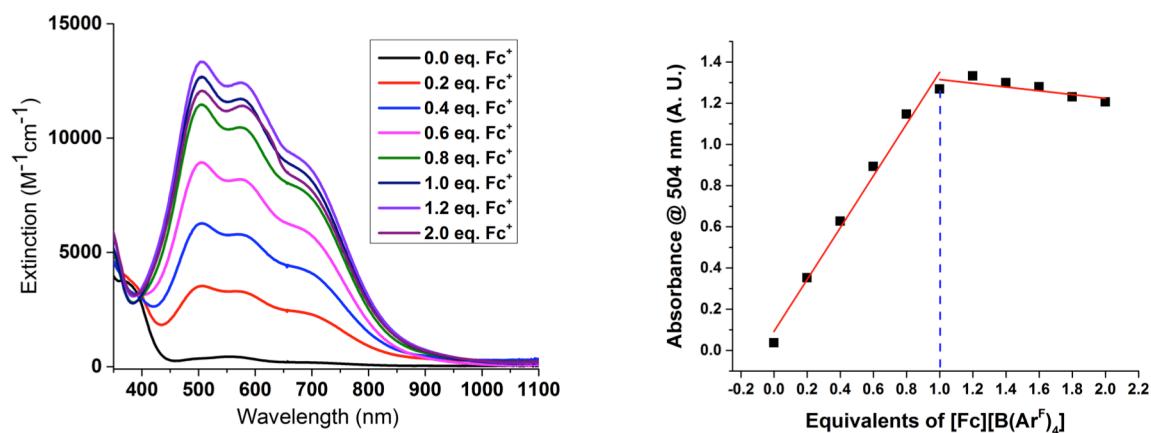

**Figure S10.** UV-vis absorption spectra upon addition of varying equivalents of  $[\text{Fc}][\text{B}(\text{Ar}^{\text{F}})_4]$  to 0.1 mM THF solution of  $[\text{NBu}_4][\mathbf{2a}]$  at  $-80^\circ\text{C}$  (left) and plot of corresponding absorbance values at  $\lambda = 504\text{ nm}$  as a function of varying equivalents of  $[\text{Fc}][\text{B}(\text{Ar}^{\text{F}})_4]$  (right).

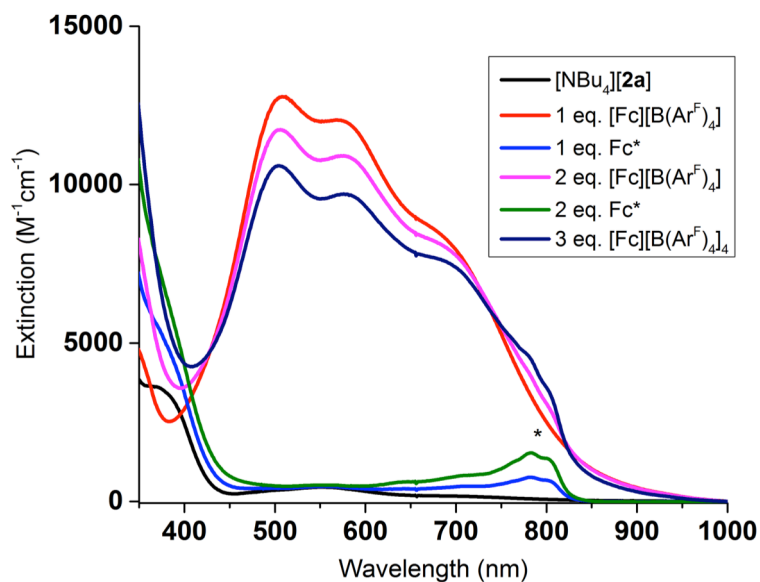

**Figure S11.** UV-Vis titration of  $[\text{Fc}][\text{B}(\text{Ar}^{\text{F}})_4]$  and decamethyl ferrocene ( $\text{Fc}^*$ ) to a 0.1 mM THF solution of  $[\text{NBu}_4][\mathbf{2a}]$  at  $-80^\circ\text{C}$  (\* denotes decamethyl ferrocenium signal).

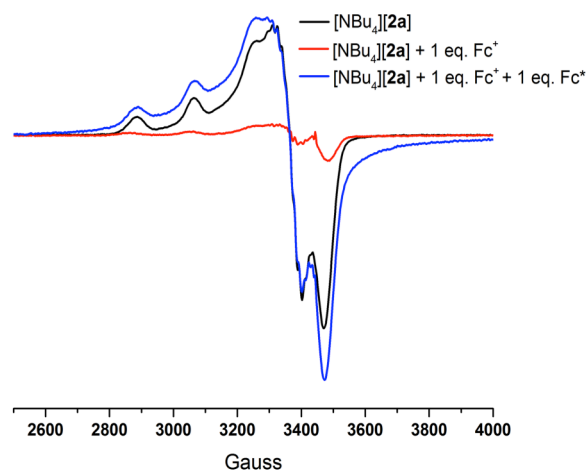

**Figure S12.** Overlaid EPR spectra of  $[\text{NBu}_4][\mathbf{2a}]$ ,  $[\text{NBu}_4][\mathbf{2a}]$  after addition of  $[\text{Fc}][\text{B}(\text{Ar}^{\text{F}})_4]$ , and  $[\text{NBu}_4][\mathbf{2a}]$  after subsequent addition of  $[\text{Fc}][\text{B}(\text{Ar}^{\text{F}})_4]$  and then  $\text{Fc}^*$ . All Spectra taken at 1 mM in THF at 30 K.

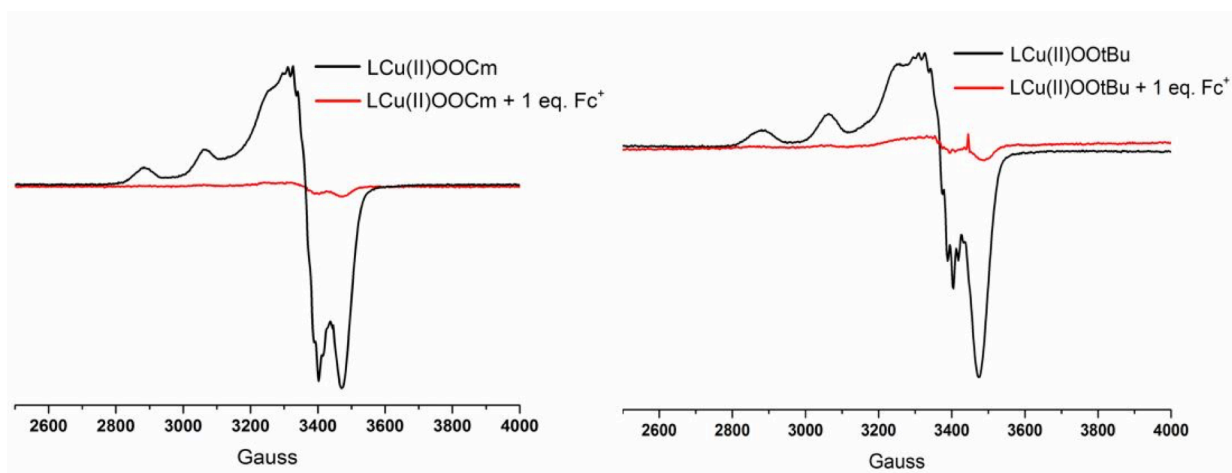

**Figure S13.** Starting and oxidized EPR spectra of 1 mM  $[\text{NBu}_4][\mathbf{2a}]$  (left) and 1 mM  $[\text{NBu}_4][\mathbf{2b}]$  (right) at 30 K in THF (oxidation performed using  $[\text{Fc}][\text{B}(\text{Ar}^{\text{F}})_4]$ ).

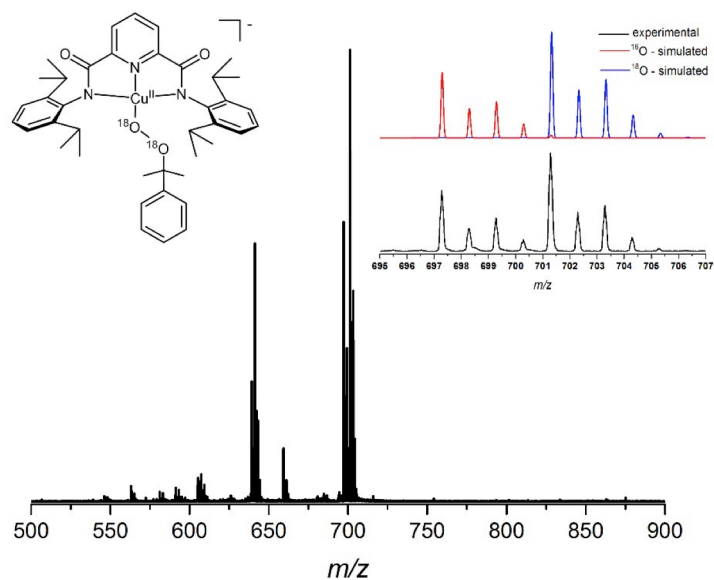

**Figure S14.** Negative mode low-res ESI-MS of  $^{18}\text{O}$  isotopically labeled  $[\text{NBu}_4][\mathbf{2a}]$ , with simulated isotopic pattern for the parent ion shown in the inset (60% incorporation of label).

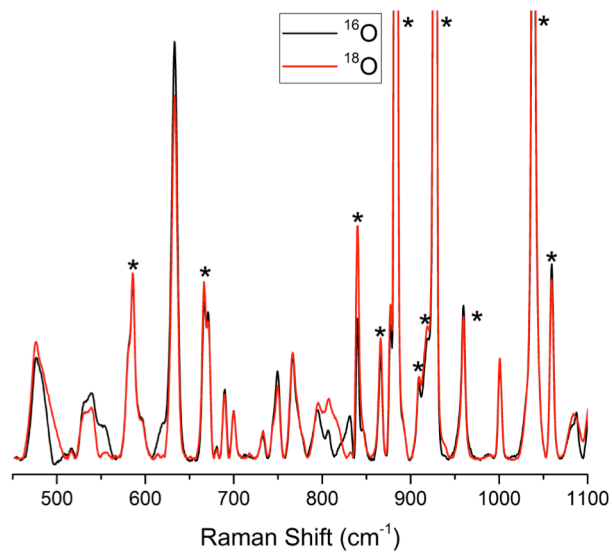

**Figure S15.** Full resonance Raman spectra of  $[\text{NBu}_4][\mathbf{2a}]$  with  $^{16}\text{O}$  (black) and  $^{18}\text{O}$  (red) showing a shift of the peak at  $831\text{ cm}^{-1}$  to  $813\text{ cm}^{-1}$  (\* denotes solvent).

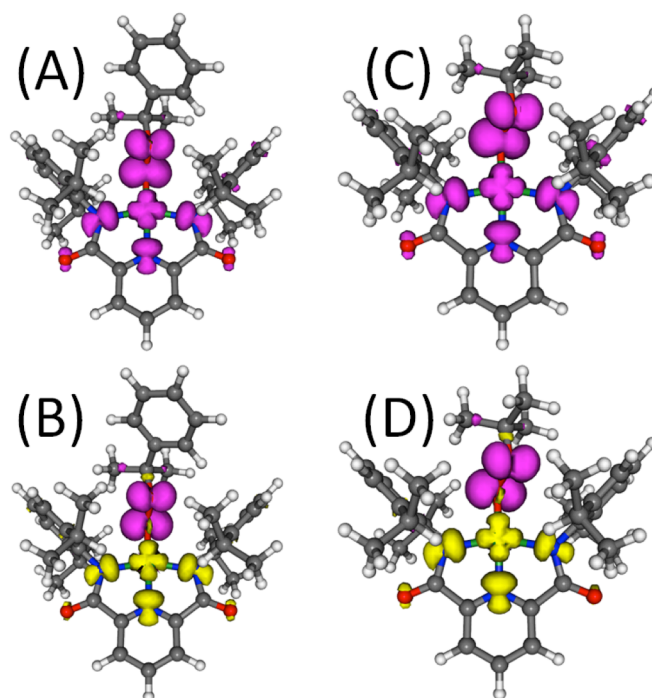

**Figure S16.** Spin density plots (pink is positive density, yellow is negative density) of  $[\text{CuOOR}]^{2+}$  for [(A,B) R = cumyl **[2a]**; (C,D) R = tBu **[2b]**] where (A & C) are the triplet states and (B & D) are the broken-symmetry solution singlet states using PBE0 / Def2-TZVP | Def2-QZVP(Cu) level of theory where gray, white, blue, red, and green atoms represent C, H, N, O, and Cu, respectively.

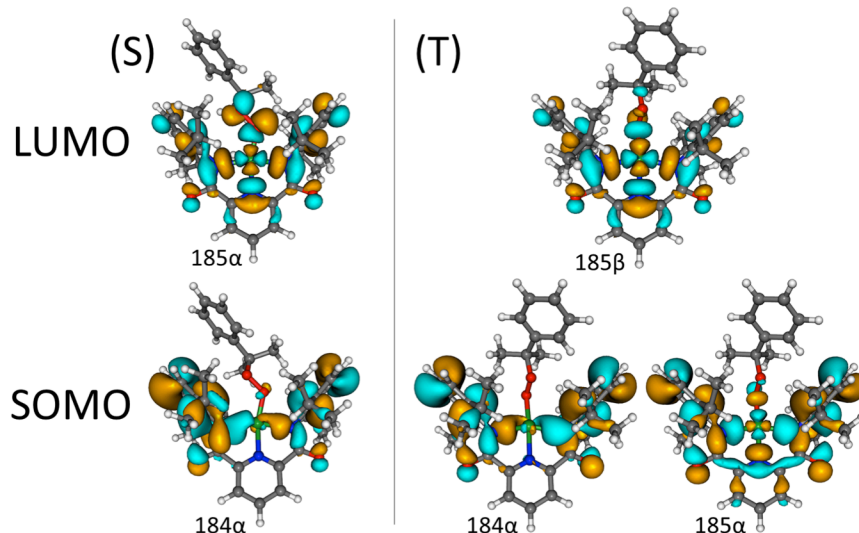

**Figure S17.** Kohn-Sham molecular orbital plots (orange is positive density, cyan is negative density) of  $[\text{CuOOCm}]^{2+}$ , **3a** where (S) is the singlet state and (T) is the triplet state using PBE0 / Def2-TZVP | Def2-QZVP(Cu) level of theory where gray, white, blue, red, and green atoms represent C, H, N, O, and Cu, respectively. Numbers indicate the orbital level with  $\alpha$  = spin up and  $\beta$  = spin down. SOMO is singly occupied molecular orbital and LUMO is lowest unoccupied molecular orbital.

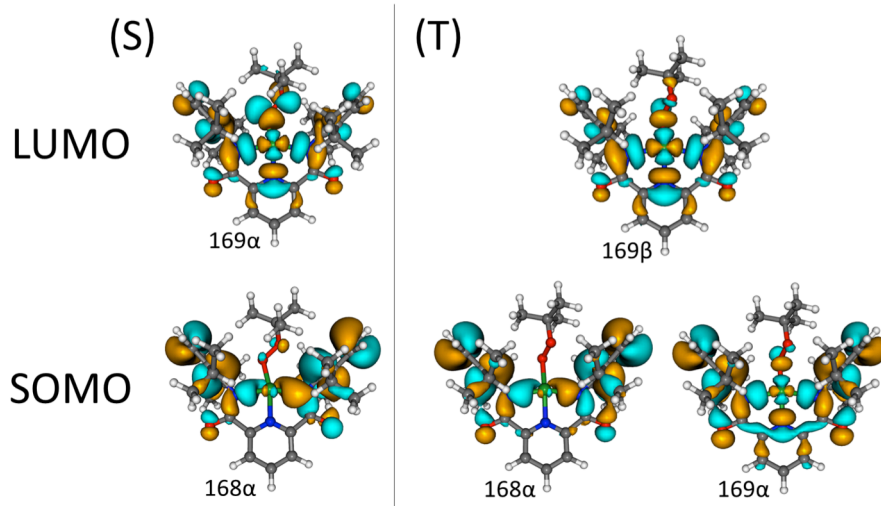

**Figure S18.** Kohn-Sham molecular orbital plots (orange is positive density, cyan is negative density) of  $[\text{CuOOtBu}]^{2+}$ , **3b** where (S) is the singlet state and (T) is the triplet state using PBE0 / Def2-TZVP | Def2-QZVP(Cu) level of theory where gray, white, blue, red, and green atoms represent C, H, N, O, and Cu, respectively. Numbers indicate the orbital level with  $\alpha$  = spin up and  $\beta$  = spin down. SOMO is singly occupied molecular orbital and LUMO is lowest unoccupied molecular orbital.



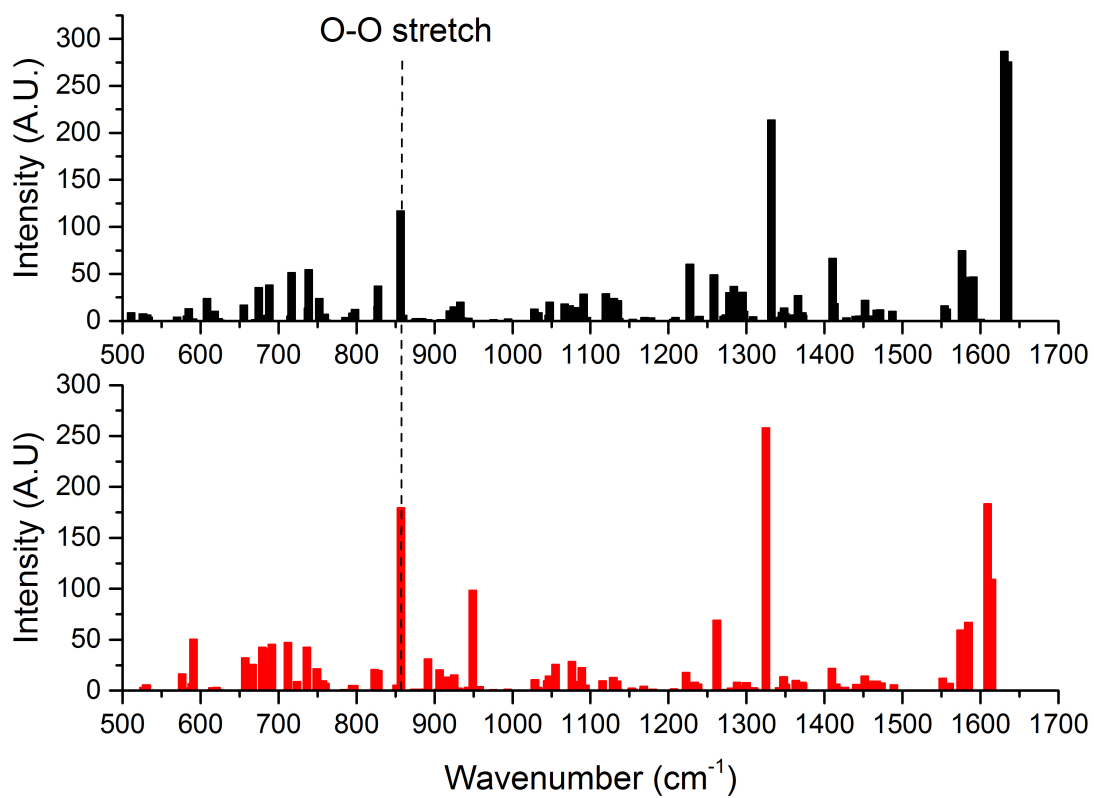

**Figure S19.** TD-DFT predicted [PBE0 / Def2-TZVP] spectrum of the singlet state (black line) and triplet state (red line) of **3a**.

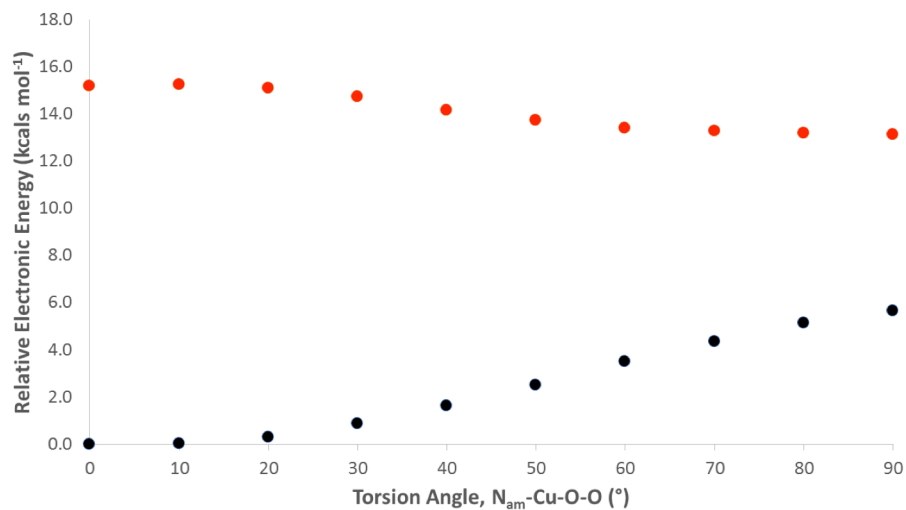

**Figure S20.** Relaxed surface scan of **3a** [*m*PWPW / Def2-TZVP] tracking the electronic energy of the singlet (black) and triplet (red) states by varying the torsion angle about the N<sub>amide</sub>-Cu-O-O. Note that the electronic energy of the singlet state has not been spin purified.

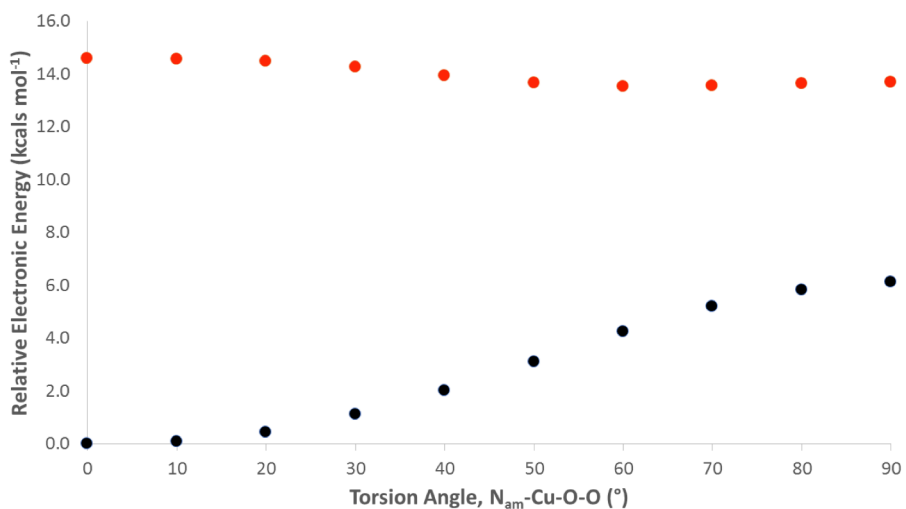

**Figure S21.** Relaxed surface scan of **3b** [*m*PWPW / Def2-TZVP] tracking the electronic energy of the singlet (black) and triplet (red) states by varying the torsion angle about the N<sub>amide</sub>-Cu-O-O. Note that the electronic energy of the singlet state has not been spin purified.

**Table S3.** Functional screen of the broken-symmetry calculations for **3a** (top series) and **3b** (bottom series) starting from the *triplet* state optimized geometry [*m*PWPW / Def2-TZVP | Def2-QZVP(Cu)] where a negative number indicates the singlet state is favored and a positive number means the triplet state is favored for the ground state. Electronic energy of the singlet state ( $E_S$ ) was spin purified according to eq. 4.

| Complex   | Functional <sup>a</sup> | $E_T$ (Eh)   | $E_{BS}$ (Eh) | $\langle S^2_T \rangle$ | $\langle S^2_{BS} \rangle$ | Spin Purified $E_S$ (kcal/mol) |
|-----------|-------------------------|--------------|---------------|-------------------------|----------------------------|--------------------------------|
| <b>3a</b> | <i>m</i> PWPW           | -3659.545698 | -3659.550960  | 2.005                   | 0.553                      | -4.6                           |
|           | BP86                    | -3659.226612 | -3659.230524  | 2.007                   | 0.562                      | -3.4                           |
|           | OLYP                    | -3659.877159 | -3659.882306  | 2.005                   | 0.553                      | -4.5                           |
|           | TPSS                    | -3659.988592 | -3659.993048  | 2.006                   | 0.575                      | -3.9                           |
|           | M06-L                   | -3659.314125 | -3659.316289  | 2.010                   | 0.580                      | -1.9                           |
|           | B3LYP                   | -3658.284841 | -3658.282856  | 2.010                   | 0.924                      | 2.3                            |
|           | PBE0                    | -3656.974595 | -3656.972625  | 2.011                   | 1.008                      | 2.5                            |
|           | TPSSh                   | -3659.733747 | -3659.733713  | 2.009                   | 0.765                      | 0.0                            |
|           | PW6B95                  | -3663.008901 | -3663.006935  | 2.010                   | 1.008                      | 2.5                            |
|           | M06                     | -3658.099305 | -3658.095872  | 2.012                   | 0.937                      | 4.1                            |
|           | M06-2X                  | -3658.701729 | -3658.700219  | 2.012                   | 1.010                      | 1.9                            |
|           | PWPB95                  | -3664.091592 | -3664.090095  | 2.015                   | 1.014                      | 1.9                            |
| Complex   | Functional <sup>a</sup> | $E_T$ (Eh)   | $E_{BS}$ (Eh) | $\langle S^2_T \rangle$ | $\langle S^2_{BS} \rangle$ | Spin Purified $E_S$ (kcal/mol) |
| <b>3b</b> | <i>m</i> PWPW           | -3467.773868 | -3467.779513  | 2.005                   | 0.555                      | -4.9                           |
|           | BP86                    | -3467.504909 | -3467.509186  | 2.006                   | 0.564                      | -3.8                           |
|           | OLYP                    | -3468.082143 | -3468.087702  | 2.005                   | 0.555                      | -4.8                           |
|           | TPSS                    | -3468.156636 | -3468.161426  | 2.006                   | 0.577                      | -4.2                           |
|           | M06-L                   | -3467.541244 | -3467.543870  | 2.010                   | 0.590                      | -2.3                           |
|           | B3LYP                   | -3466.607097 | -3466.605961  | 2.010                   | 0.899                      | 1.3                            |
|           | PBE0                    | -3465.405376 | -3465.403522  | 2.011                   | 0.994                      | 2.3                            |
|           | TPSSh                   | -3467.923568 | -3467.924091  | 2.009                   | 0.774                      | -0.5                           |
|           | PW6B95                  | -3470.953343 | -3470.951542  | 2.010                   | 0.992                      | 2.3                            |
|           | M06                     | -3466.450587 | -3466.448062  | 2.012                   | 0.884                      | 2.9                            |
|           | M06-2X                  | -3466.975813 | -3466.974268  | 2.012                   | 1.010                      | 2.0                            |
|           | PWPB95                  | -3472.438347 | -3472.436818  | 2.016                   | 1.014                      | 2.0                            |

<sup>a</sup> All calculations used the Def2-TZVP | Def2-QZVP(Cu) basis set, see experimental section for further details.

**Table S4.** Functional screen of the broken-symmetry calculations for **3a** and **3b** starting from the *singlet* state optimized geometry [*mPWPW* / Def2-TZVP | Def2-QZVP(Cu)] where a negative number indicates the singlet state is favored and a positive number means the triplet state is favored for the ground state. Electronic energy of the singlet state ( $E_S$ ) was spin purified according to eq. 4.

| Complex   | Functional <sup>a</sup> | $E_T$ (Eh)   | $E_{BS}$ (Eh) | $\langle S^2_T \rangle$ | $\langle S^2_{BS} \rangle$ | Spin Purified $E_S$ (kcal/mol) |
|-----------|-------------------------|--------------|---------------|-------------------------|----------------------------|--------------------------------|
| <b>3a</b> | <i>mPWPW</i>            | -3659.529426 | -3659.566989  | 2.005                   | 0.000                      | -23.7                          |
|           | M06-L                   | -3659.303285 | -3659.338407  | 2.011                   | 0.000                      | -22.1                          |
|           | PBE0                    | -3656.952555 | -3656.976949  | 2.012                   | 0.326                      | -18.4                          |
|           | M06-2X                  | -3658.679340 | -3658.692578  | 2.013                   | 0.791                      | -13.8                          |
| <b>3b</b> | <i>mPWPW</i>            | -3467.757952 | -3467.795736  | 2.005                   | 0.000                      | -23.8                          |
|           | M06-L                   | -3467.529614 | -3467.564999  | 2.011                   | 0.000                      | -22.3                          |
|           | PBE0                    | -3465.38489  | -3465.408997  | 2.012                   | 0.332                      | -18.2                          |
|           | M06-2X                  | -3466.955196 | -3466.968200  | 2.012                   | 0.792                      | -13.6                          |

<sup>a</sup> All calculations used the Def2-TZVP | Def2-QZVP(Cu) basis set, see experimental section for further details.

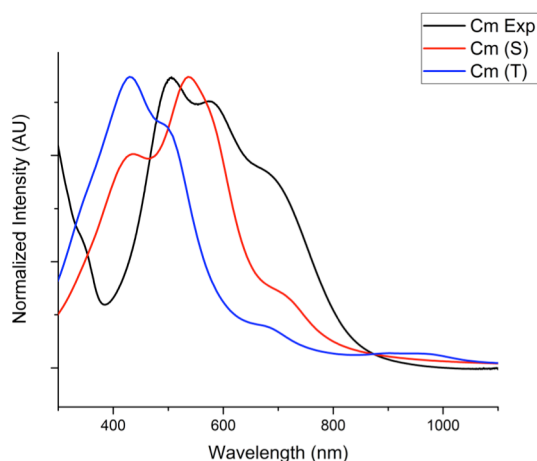

**Figure S22.** Overlay of **3a** experimental UV-Vis spectrum [THF, -80°C, black line] with the TD-DFT predicted [PBE0 / Def2-TZVP] spectrum of the singlet state (red line) and triplet state (blue line) using a Lorentzian lineshape (half-width = 50 nm), normalized to the  $\lambda_{\max}$  of the experimental spectrum.

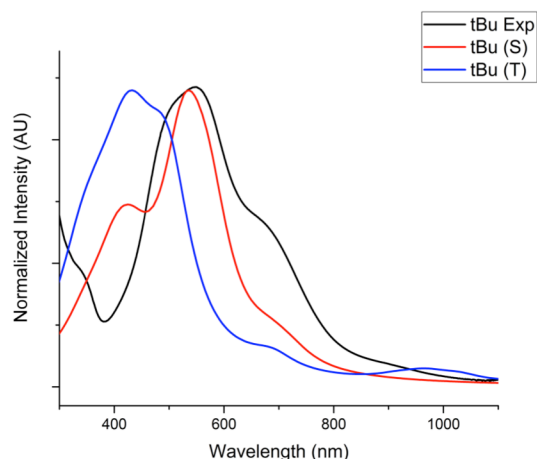

**Figure S23.** Overlay of **3b** experimental UV-Vis spectrum [THF,  $-80^{\circ}\text{C}$ , black line] with the TD-DFT predicted [PBE0 / Def2-TZVP] spectrum of the singlet state (red line) and triplet state (blue line) using a Lorentzian lineshape (half-width = 50 nm), normalized to the  $\lambda_{\text{max}}$  of the experimental spectrum.

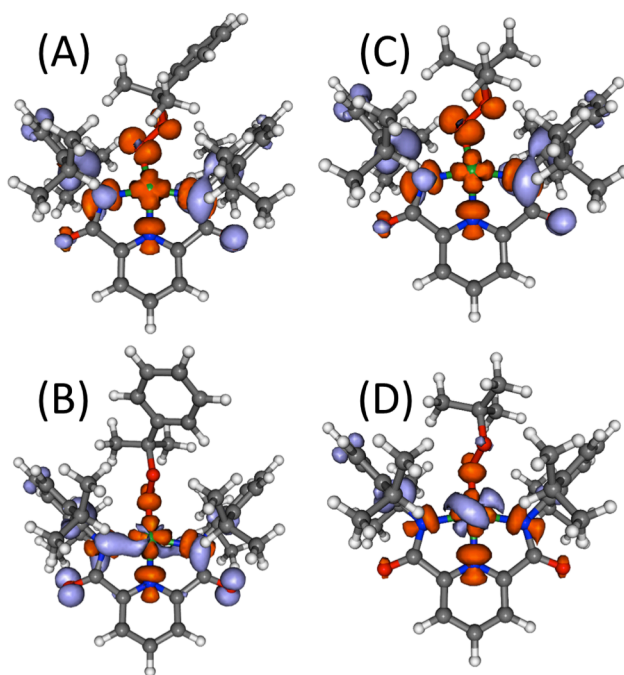

**Figure S24.** TD-DFT difference density plots of the most intense oscillator strength transition (purple is loss of electron density, orange gain of electron density) of  $[\text{CuOOR}]^{2+}$  for [(A,B) R = cumyl, **3a**; (C,D) R = tBu, **3b** where (A & C) are the singlet states and (B & D) are the triplet states using PBE0 / Def2-TZVP level of theory where gray, white, blue, red, and green atoms represent C, H, N, O, and Cu, respectively.

**Table S5.** TD-DFT for **3a,b** in the singlet and triplet states using PBE0 / Def2-TZVP of the first 40 excited states with an oscillator strength threshold of >0.001. Bolded values are pictured as difference density plots in Figure S23.

| <b>3a (S)</b> |              | <b>3a (T)</b> |              | <b>3b (S)</b> |              | <b>3b (T)</b> |              |
|---------------|--------------|---------------|--------------|---------------|--------------|---------------|--------------|
| Energy (nm)   | $f_{osc.}$   |
| 722           | 0.038        | 1453          | 0.005        | 719           | 0.019        | 1444          | 0.009        |
| 690           | 0.020        | 995           | 0.001        | 682           | 0.027        | 1177          | 0.002        |
| 605           | 0.008        | 972           | 0.002        | 579           | 0.039        | 1030          | 0.003        |
| 584           | 0.180        | 946           | 0.001        | 568           | 0.150        | 985           | 0.001        |
| 564           | 0.007        | 895           | 0.002        | 561           | 0.007        | 964           | 0.004        |
| <b>531</b>    | <b>0.262</b> | 685           | 0.008        | <b>527</b>    | <b>0.294</b> | 915           | 0.002        |
| 479           | 0.033        | 588           | 0.001        | 433           | 0.067        | 689           | 0.008        |
| 447           | 0.035        | 543           | 0.003        | 429           | 0.025        | 649           | 0.001        |
| 434           | 0.046        | 509           | 0.063        | 405           | 0.096        | 637           | 0.001        |
| 429           | 0.056        | 499           | 0.011        | 391           | 0.019        | <b>501</b>    | <b>0.056</b> |
| 405           | 0.067        | 449           | 0.018        | 367           | 0.002        | 493           | 0.027        |
| 396           | 0.031        | <b>430</b>    | <b>0.072</b> | 364           | 0.002        | 466           | 0.001        |
| 370           | 0.001        | 425           | 0.001        | 360           | 0.010        | 453           | 0.023        |
| 364           | 0.004        | 408           | 0.009        | 347           | 0.015        | 427           | 0.029        |
| 360           | 0.003        | 395           | 0.002        | 344           | 0.015        | 425           | 0.034        |
| 351           | 0.008        | 394           | 0.001        | 342           | 0.007        | 405           | 0.011        |
| 347           | 0.027        | 393           | 0.003        | 338           | 0.004        | 396           | 0.006        |
|               |              | 388           | 0.002        |               |              | 391           | 0.002        |
|               |              | 386           | 0.017        |               |              | 388           | 0.003        |
|               |              | 377           | 0.001        |               |              | 382           | 0.003        |
|               |              | 373           | 0.001        |               |              | 371           | 0.010        |
|               |              | 365           | 0.002        |               |              | 368           | 0.002        |
|               |              | 359           | 0.001        |               |              | 365           | 0.006        |
|               |              | 355           | 0.001        |               |              | 364           | 0.002        |
|               |              | 350           | 0.001        |               |              | 358           | 0.001        |
|               |              | 348           | 0.004        |               |              | 351           | 0.003        |
|               |              | 344           | 0.002        |               |              | 351           | 0.001        |
|               |              | 341           | 0.017        |               |              | 345           | 0.002        |
|               |              | 338           | 0.001        |               |              | 345           | 0.002        |
|               |              | 337           | 0.005        |               |              | 340           | 0.008        |
|               |              | 334           | 0.001        |               |              | 338           | 0.004        |
|               |              |               |              |               |              | 335           | 0.008        |
|               |              |               |              |               |              | 332           | 0.002        |
|               |              |               |              |               |              | 330           | 0.006        |
|               |              |               |              |               |              | 328           | 0.001        |

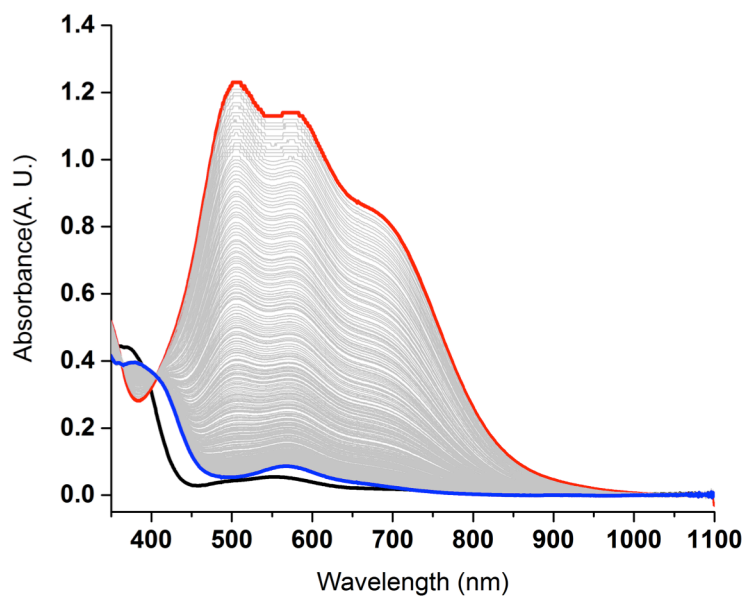

**Figure S25.** Reaction of 0.1 mM **3a** with 100 equiv. TEMPO-H at -80 °C in THF. Starting spectrum [NBu<sub>4</sub>][**2a**] (black), oxidized spectrum **3a** (red), and final decay spectrum (blue).

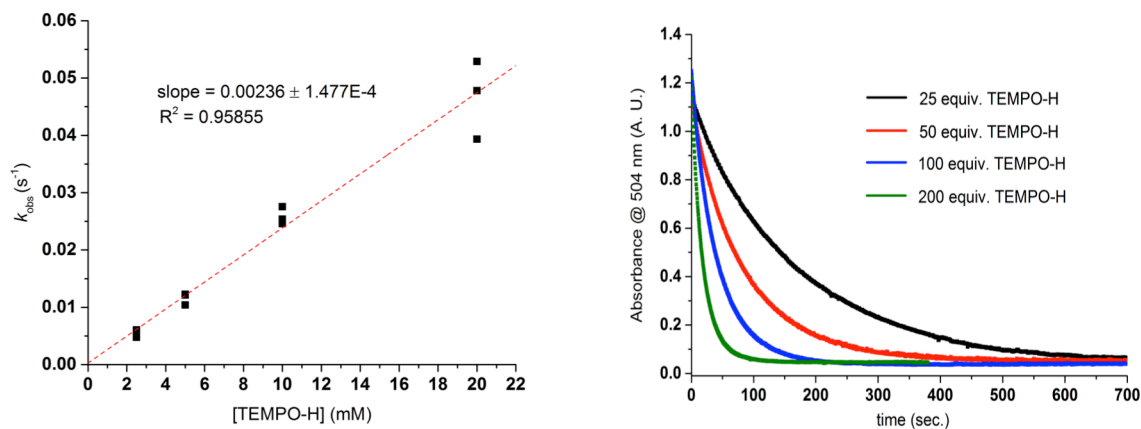

**Figure S26.** Plot of observed rates of reaction of **3a** with TEMPO-H vs. concentration of TEMPO-H (left). Plot of decay of 504 nm feature over time with varying equivalents of TEMPO-H (right).

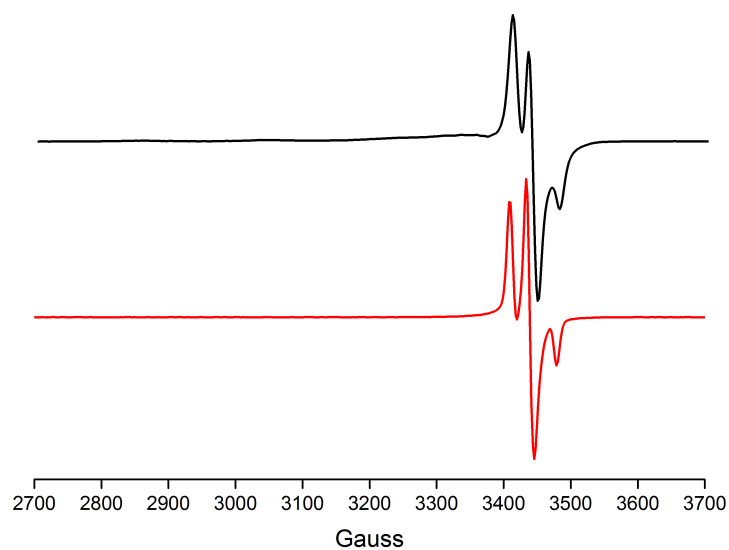

**Figure S27.** Continuous wave X-band EPR spectra of solution of products of reaction of 1 mM **3a** with TEMPO-H (10 equiv.) at -80 °C (black trace) and 0.5 mM standard of TEMPO• radical (red trace). EPR spectra collected in THF at 30K and 55 dB.

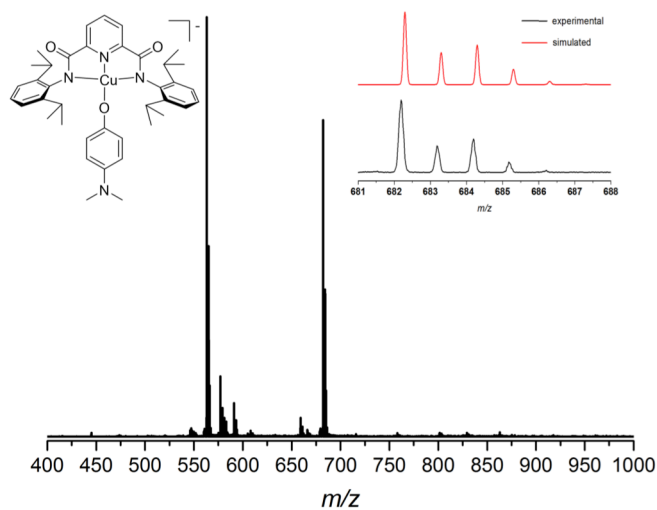

**Figure S28:** Negative mode Hi-res ESI-MS of  $[\text{NBu}_4][\mathbf{5}]$ , simulated isotopic patterns inset.



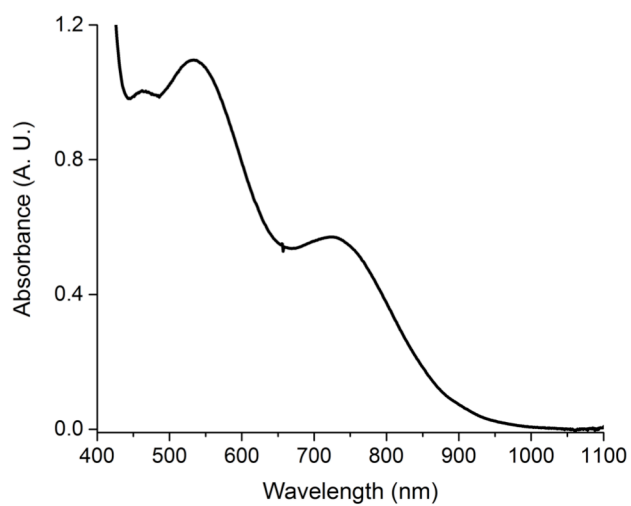

**Figure S29.** UV-visible spectrum of 1 mM solution of  $[\text{NBu}_4][\mathbf{5}]$  in THF at  $-80\text{ }^\circ\text{C}$ .

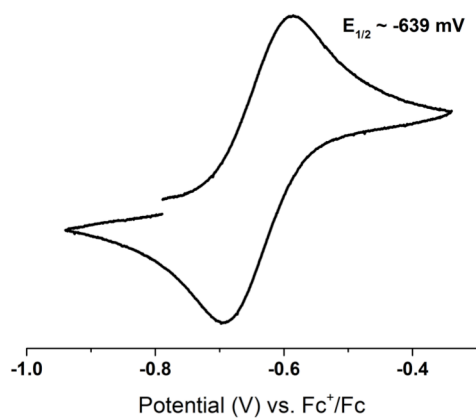

**Figure S30.** Cyclic voltammogram of 2 mM solution  $[\text{NBu}_4][\mathbf{5}]$  in THF (0.3 M  $\text{NBu}_4\text{PF}_6$ ) with a scan rate of 50 mV/s.

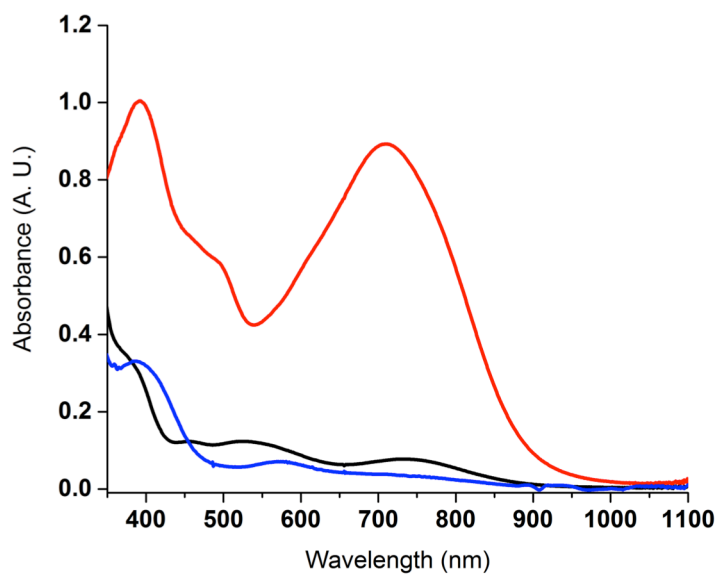

**Figure S31.** Overlaid UV-vis spectrum of 0.1 mM [NBu<sub>4</sub>][5] (black), 4 (red), and decay product of 4 (blue) taken at -80 °C in THF.

DFT Geometry Optimized Structures

Table S6. Cartesian coordinates (Å) for [LCu<sup>II</sup>-OOCm]<sup>-</sup>

| Atom | X                 | Y                 | Z                 |
|------|-------------------|-------------------|-------------------|
| Cu   | -0.19662246446940 | 0.29777605978648  | -0.21231773163458 |
| O    | -1.77373338530120 | 0.87468114388783  | 0.63511785770254  |
| O    | -1.76719086112923 | 1.82638904248594  | 1.72720656166120  |
| N    | 1.13826908712189  | -0.21956277404388 | -1.55686910818966 |
| C    | 2.42054334607672  | 0.07487712353120  | -1.32623664645790 |
| C    | 3.39975960277324  | -0.24926416191328 | -2.26596472069561 |
| H    | 4.43526283974261  | 0.00529704884249  | -2.04896919141164 |
| C    | 3.00207436143902  | -0.89321506449187 | -3.44102175194483 |
| H    | 3.74478792798630  | -1.15731456906948 | -4.19498667260109 |
| C    | 1.65626174845164  | -1.20961540244198 | -3.64682268430671 |
| H    | 1.29590143581673  | -1.72208804397238 | -4.53670269288659 |
| C    | 0.73373680779241  | -0.85537942620518 | -2.66163728697697 |
| C    | -0.74510467381098 | -1.15945581871703 | -2.72366510759149 |
| N    | -1.38109674268976 | -0.77587229766552 | -1.59686877028048 |
| C    | -2.77375128061848 | -0.98374027308572 | -1.48964664033805 |
| C    | -3.68234977765902 | -0.02134464137017 | -1.99747907655535 |
| C    | -5.05526516172734 | -0.23898403707217 | -1.83988191319598 |
| H    | -5.75976051946532 | 0.49724413118513  | -2.23090764593332 |
| C    | -5.54106391044026 | -1.37319963078419 | -1.19446894305634 |
| H    | -6.61533491674268 | -1.52378008153220 | -1.07926258305944 |
| C    | -4.64232152078828 | -2.31361460675621 | -0.69304578140424 |
| H    | -5.02556662822833 | -3.20144104911624 | -0.18850367589124 |
| C    | -3.26123640378212 | -2.14132668143880 | -0.82736743411883 |
| C    | -2.29382962451784 | -3.20099791696193 | -0.32127579114168 |
| H    | -1.32370429543345 | -2.69971870515241 | -0.19229869833238 |
| C    | -2.69137849839432 | -3.80224256037588 | 1.03431899355199  |
| H    | -2.85049504441925 | -3.02157902069629 | 1.78929002981571  |
| H    | -1.89867672009283 | -4.47172777187011 | 1.39801738834231  |
| H    | -3.61269203446535 | -4.39884243024901 | 0.96608867586543  |
| C    | -2.10204156712343 | -4.30866089425641 | -1.37618843039987 |
| H    | -1.80243702735938 | -3.88361979798828 | -2.34192671506712 |
| H    | -3.04082767304950 | -4.86291031536350 | -1.52656416230891 |
| H    | -1.33277482647306 | -5.02628303354290 | -1.05271868366288 |
| C    | -3.19181817386295 | 1.22174285238891  | -2.72337188623364 |
| H    | -2.09865760057227 | 1.23632148164661  | -2.62446404170521 |
| C    | -3.72174859024464 | 2.51542272765892  | -2.08519054439865 |
| H    | -3.43759732396614 | 2.56249467321778  | -1.02684379843453 |
| H    | -4.81732756974665 | 2.58491015691045  | -2.15508361721528 |
| H    | -3.30185168761415 | 3.39428477640758  | -2.59656508275402 |
| C    | -3.52182720713003 | 1.15278676149057  | -4.22549328539209 |
| H    | -3.10297485532777 | 0.24204668737997  | -4.67134920459592 |
| H    | -3.10498703090674 | 2.02356159357069  | -4.75363570344548 |
| H    | -4.60947000895879 | 1.14861052252532  | -4.39256884816748 |
| O    | -1.21286583349606 | -1.71790881905948 | -3.73753875831498 |
| C    | 2.69534648041026  | 0.72487698487146  | 0.00715798327863  |
| O    | 3.87175532781420  | 1.01652419159340  | 0.30744753832550  |
| N    | 1.57090370267793  | 0.89533131229588  | 0.74061342862245  |
| C    | 1.71671141662087  | 1.43238996390689  | 2.04467421129448  |
| C    | 1.47073543718060  | 2.81235390091814  | 2.26781440421155  |
| C    | 1.57036532594997  | 3.31369194988590  | 3.56904156632221  |
| H    | 1.37060518966355  | 4.36917258091330  | 3.75273316108548  |
| C    | 1.91630746656583  | 2.49002799110441  | 4.63861119489729  |
| H    | 1.98496521609119  | 2.90008201513883  | 5.64709088437595  |
| C    | 2.17389082356518  | 1.14116226889961  | 4.40962397684318  |
| H    | 2.45788499142874  | 0.50085428303465  | 5.24653198136732  |
| C    | 2.08157280492566  | 0.58940570723314  | 3.12618338284440  |
| C    | 2.42341621117884  | -0.87924972355762 | 2.91059544470505  |
| H    | 2.09852696855276  | -1.13707405818239 | 1.89326113175522  |
| C    | 3.94691170377408  | -1.0999558311346  | 2.98242839212150  |
| H    | 4.46400017863540  | -0.44505783128790 | 2.27136841814032  |
| H    | 4.19860229148458  | -2.14518767318376 | 2.74683686957712  |
| H    | 4.32352252494728  | -0.88252271289336 | 3.99337408294618  |
| C    | 1.69281756471125  | -1.82198570643451 | 3.88033430433915  |
| H    | 1.92292325567369  | -2.86936416935017 | 3.63631326178986  |
| H    | 0.60491819436835  | -1.69177948556507 | 3.82702421131768  |
| H    | 2.00184400872641  | -1.65423040274812 | 4.92221103884531  |
| C    | 1.16807671172680  | 3.73422680045439  | 1.09605793565606  |
| H    | 0.67629719795529  | 3.11561866161920  | 0.33166527200233  |
| C    | 2.47745861728428  | 4.27610683439739  | 0.48661332683495  |
| H    | 3.17223371178271  | 3.464885036840674 | 0.23895587690001  |
| H    | 2.98265560943946  | 4.94353143160042  | 1.20123691416777  |
| H    | 2.26831924772056  | 4.85429300477497  | -0.42619331060022 |
| C    | 0.21729315212951  | 4.88760251224760  | 1.43766016702967  |
| H    | -0.70426013603015 | 4.51807542778204  | 1.90148682733302  |
| H    | -0.05277197184105 | 5.43164519765716  | 0.52110998036336  |
| H    | 0.68115664401243  | 5.61569962340867  | 2.11959073522742  |
| C    | -2.55168864245567 | 1.29015884834701  | 2.83752059424368  |
| C    | -1.80640815593672 | 0.10863955490089  | 3.45746435031972  |
| C    | -3.94267034685078 | 0.84931583491977  | 2.34786154440898  |
| H    | -1.63790762275032 | -0.63204959106357 | 2.66746847000816  |
| H    | -2.39191963091971 | -0.36830586181022 | 4.25537855597285  |
| H    | -0.83478522594993 | 0.42137120615298  | 3.85662710266346  |
| H    | -3.84200615551884 | 0.03593183383164  | 1.62204430608307  |
| H    | -4.46699175261609 | 1.68123561315275  | 1.86302787232602  |
| H    | -4.54697830891270 | 0.50781926090395  | 3.19928706546642  |
| C    | -2.69924670993772 | 2.49208985724545  | 3.77177873720882  |

|   |                   |                  |                  |
|---|-------------------|------------------|------------------|
| C | -2.42059012715125 | 2.42202481749002 | 5.14195813122455 |
| C | -3.17005118884926 | 3.71069905040823 | 3.25567254081969 |
| C | -3.35781605866884 | 4.81799631882907 | 4.08148083579528 |
| C | -3.08537532026038 | 4.73067639142316 | 5.44914817846267 |
| C | -2.61640054126887 | 3.52721795488752 | 5.97471909025103 |
| H | -2.03905752875162 | 1.49714142354933 | 5.57036444216605 |
| H | -3.37442587283041 | 3.78676867985483 | 2.18888089954226 |
| H | -3.71616522793217 | 5.75533751773184 | 3.65422584509637 |
| H | -3.23254890213748 | 5.59539950765234 | 6.09704418860971 |
| H | -2.39010626662119 | 3.44605915804176 | 7.03859945857230 |

**Table S7.** Cartesian coordinates (Å) for [LCu<sup>II</sup>-OOtBu]<sup>+</sup>

| Atom | X                 | Y                 | Z                 |
|------|-------------------|-------------------|-------------------|
| C    | 3.09910699654014  | 13.96878942866490 | 10.37195195964152 |
| H    | 2.68039262821946  | 14.95983190414300 | 10.14552858084694 |
| H    | 2.92639899917339  | 13.30706583563989 | 9.51637288160067  |
| H    | 4.18268102778830  | 14.07307565771763 | 10.51714367652990 |
| C    | 2.77022789304713  | 14.24107103555075 | 12.86304403563728 |
| H    | 3.85612372258216  | 14.34084509515394 | 12.99099561440922 |
| H    | 2.35223068947332  | 13.78680962382728 | 13.76973573422451 |
| H    | 2.34209264578757  | 15.24541640637735 | 12.74134651407479 |
| C    | 0.93659846565174  | 13.22986971476084 | 11.45492894256141 |
| H    | 0.73385997947762  | 12.51192944656193 | 10.65252031820813 |
| H    | 0.47351847360454  | 14.19176172137453 | 11.19342767956038 |
| H    | 0.48310371416421  | 12.86259406887759 | 12.38358366261326 |
| Cu   | 2.34793964678739  | 9.42987792647916  | 11.18637989939431 |
| N    | 2.41819099308560  | 8.99633574447313  | 9.12266638562776  |
| O    | 2.60413554343623  | 7.14474922949818  | 7.69586738779529  |
| C    | 2.29261122627647  | 6.81420588715119  | 10.03808287845873 |
| N    | 2.20048844614265  | 7.47552428082305  | 11.19724017413023 |
| C    | 2.46254833162113  | 7.68324822456232  | 8.81342808072632  |
| C    | 2.21592546953274  | 5.42122088079407  | 10.01511692926159 |
| H    | 2.29946606347139  | 4.91155542047370  | 9.05716193487102  |
| C    | 2.57392801121516  | 9.95142881108306  | 8.09355623444920  |
| C    | 3.86852721036250  | 10.37919343463413 | 7.70549821823646  |
| C    | 3.98720906260334  | 11.36105349242770 | 6.71581638724590  |
| H    | 4.98153072466626  | 11.69334298365072 | 6.41222722017617  |
| C    | 1.42477592285085  | 10.51987265516641 | 7.48311427494819  |
| C    | 2.86516916625803  | 11.92306702948798 | 6.11246289491289  |
| H    | 2.97849013508656  | 12.68976022820259 | 5.34470586298349  |
| C    | 5.11948439404665  | 9.77512667764745  | 8.32501387461800  |
| H    | 4.78595263770670  | 9.12506522150162  | 9.14421853422380  |
| C    | 2.03280965746763  | 4.74589250203635  | 11.22515293798468 |
| H    | 1.97053118345695  | 3.65692779325011  | 11.23685048281369 |
| C    | 1.59476171166406  | 11.49931821990875 | 6.49988785018367  |
| H    | 0.71755880356926  | 11.94012886715318 | 6.02466115953243  |
| C    | 0.03444749446250  | 10.02863356455601 | 7.85829932008783  |
| H    | 0.12057192244897  | 9.59084212405972  | 8.86337530493570  |
| C    | -0.41907385192936 | 8.90490580601055  | 6.90517875600810  |
| H    | -0.54833965627663 | 9.29590559799388  | 5.88458068118628  |
| H    | -1.38189115791123 | 8.48252054392487  | 7.23086663239451  |
| H    | 0.32373543105252  | 8.09883837161592  | 6.86659388412668  |
| C    | 2.44874471715168  | 13.38732282855886 | 11.63302667972903 |
| C    | -1.01871047204068 | 11.14366774429796 | 7.92414168302770  |
| H    | -1.22926632651780 | 11.57048899359481 | 6.93268995279821  |
| H    | -0.69853093036620 | 11.96143309738426 | 8.58241634890427  |
| H    | -1.96694709624305 | 10.74502702070225 | 8.31246858919675  |
| C    | 6.03945133591931  | 10.84145061375727 | 8.93988801018147  |
| H    | 6.42555132308073  | 11.53488278067880 | 8.17821390218623  |
| H    | 6.90586907299272  | 10.36595392858692 | 9.42314282931994  |
| H    | 5.49752479234413  | 11.42239620431586 | 9.69598925485232  |
| C    | 5.86936414946132  | 8.89467238841927  | 7.30874180127380  |
| H    | 6.24189942663327  | 9.49390267649017  | 6.46431733264123  |
| H    | 5.20773484182778  | 8.11534520203615  | 6.91046716295300  |
| H    | 6.73540525192419  | 8.40870909471265  | 7.78284415989894  |
| O    | 2.87982551630080  | 11.19496962424583 | 10.85068289436124 |
| O    | 0.05631231158985  | 12.10964430807664 | 11.96118420694779 |
| N    | 1.92546695466651  | 9.07654835965578  | 13.21353187025425 |
| O    | 1.69524172430598  | 7.26814470717245  | 14.68869286843388 |
| C    | 2.00636181399783  | 6.85534126360930  | 12.36483588418379 |
| C    | 1.86494855954895  | 7.76937821460075  | 13.55743033303742 |
| C    | 1.92029858972837  | 5.46378957334018  | 12.41920807947774 |
| H    | 1.76576923299044  | 4.98860101691883  | 13.38591995458848 |
| C    | 1.75533686348959  | 10.03052192248325 | 14.24774032810053 |
| C    | 0.45231912452359  | 10.47710523285321 | 14.59093591046179 |
| C    | 0.31191775526579  | 11.44605959571077 | 15.59100538526104 |
| H    | -0.68596273425497 | 11.79280811519255 | 15.86363479388358 |
| C    | 2.88739591684656  | 10.55194314280893 | 14.92457465181425 |
| C    | 1.42004045973947  | 11.96733590902840 | 16.25516733598585 |
| H    | 1.29050938676093  | 12.72106567930029 | 17.03322083784946 |
| C    | -0.78177462077434 | 9.86548110723195  | 13.94062868146789 |
| H    | -0.43967013266960 | 9.36432962003545  | 13.02420261852412 |
| C    | 2.69462730178627  | 11.51430917436695 | 15.92083593620633 |
| H    | 3.56009829653766  | 11.91845957294076 | 16.44759330142392 |
| C    | 4.28366261658553  | 10.02998104379734 | 14.61957823031873 |
| H    | 4.22663338494262  | 9.53614376757558  | 13.63990052985099 |
| C    | 4.69686934859543  | 8.96453294481406  | 15.65426297867960 |
| H    | 4.79715138697090  | 9.41404342547375  | 16.65392773207135 |
| H    | 5.66684001781686  | 8.51931383706618  | 15.38557883737256 |
| H    | 3.94785137908942  | 8.16546296251036  | 15.71471035501306 |
| C    | 5.34173019105647  | 11.13675533391000 | 14.51161322113010 |
| H    | 5.49803606686218  | 11.65312072251418 | 15.47025658932139 |
| H    | 5.05135352766533  | 11.87771503328998 | 13.75762296456596 |

|   |                   |                   |                   |
|---|-------------------|-------------------|-------------------|
| H | 6.30840049553023  | 10.70441775201908 | 14.21480766804978 |
| C | -1.84501828870818 | 10.89768579292439 | 13.53651908193924 |
| H | -2.27819718291549 | 11.40408165047162 | 14.41118178683834 |
| H | -2.67101714126163 | 10.40058614260144 | 13.00756591671268 |
| H | -1.43162714148872 | 11.66606977934254 | 12.87157060476526 |
| C | -1.39569791402427 | 8.78816995586594  | 14.8572592882440  |
| H | -1.78643619613980 | 9.24435369017754  | 15.77950202727299 |
| H | -0.64369881945348 | 8.04052035205954  | 15.13635642889297 |
| H | -2.23068789633445 | 8.27916564326343  | 14.35215975793306 |

**Table S8.** Cartesian coordinates (Å) for **LCu<sup>III</sup>-OOCm (S)**

| Atom | X                 | Y                 | Z                 |
|------|-------------------|-------------------|-------------------|
| Cu   | -0.12497714170391 | 0.19067115967068  | -0.25998899094128 |
| O    | -1.68125288275168 | 0.76521329013202  | 0.58144128818186  |
| O    | -1.68585877626397 | 1.63975739216682  | 1.68313370668530  |
| N    | 1.18961684145763  | -0.35600315528198 | -1.53472453564114 |
| C    | 2.45955703286708  | -0.03604631260822 | -1.29529459969931 |
| C    | 3.44981496747254  | -0.38688364447476 | -2.21052815702640 |
| H    | 4.48207836836259  | -0.11709826161300 | -1.99653721964844 |
| C    | 3.06628981623338  | -1.07353092366299 | -3.36659827366868 |
| H    | 3.81834092976199  | -1.36080468403753 | -4.10085429456815 |
| C    | 1.72260445782700  | -1.39395837158512 | -3.58548396301619 |
| H    | 1.37757027170406  | -1.92484741091016 | -4.47060331352527 |
| C    | 0.78926868948464  | -1.01134424744682 | -2.62492862975698 |
| C    | -0.69436994646297 | -1.25332383208278 | -2.67759945872535 |
| N    | -1.30895868643081 | -0.78009659393202 | -1.55537174621489 |
| C    | -2.70468158142711 | -0.85944775633485 | -1.40250346876189 |
| C    | -3.52451530262041 | 0.20639043569945  | -1.86713504125507 |
| C    | -4.90818154819741 | 0.10172850571250  | -1.69616709150891 |
| H    | -5.55371720978680 | 0.90378397471855  | -2.05371919583450 |
| C    | -5.47711034762744 | -1.01132892947145 | -1.08468589705800 |
| H    | -6.55869950368570 | -1.07365844421346 | -0.96324380790857 |
| C    | -4.66476231811169 | -2.05053138316001 | -0.62860561216921 |
| H    | -5.12547986229384 | -2.91928971951035 | -0.15924929897271 |
| C    | -3.27745904979961 | -1.99876535148199 | -0.76825407791240 |
| C    | -2.41487058585119 | -3.1668641145726  | -0.31707425143614 |
| H    | -1.38496798828288 | -2.79199949813975 | -0.23092338778053 |
| C    | -2.82073434965219 | -3.73150242695883 | 1.05262885506069  |
| H    | -2.85399397619286 | -2.94991339667934 | 1.82208412389733  |
| H    | -2.09790670778521 | -4.49409987943787 | 1.37285424052932  |
| H    | -3.80657565845117 | -4.21512077735634 | 1.02082132372608  |
| C    | -2.41520338616431 | -4.28053290946298 | -1.38442347473825 |
| H    | -2.11284087661558 | -3.89449664367203 | -2.36488609600457 |
| H    | -3.41979384375847 | -4.71518982357833 | -1.48610089435336 |
| H    | -1.72602763584784 | -5.08718496734378 | -1.09694536482427 |
| C    | -2.94099412468983 | 1.40586116973725  | -2.59492746932075 |
| H    | -1.85116614107331 | 1.36782288855818  | -2.46566673768169 |
| C    | -3.42309412368683 | 2.74444894994111  | -2.01483529076708 |
| H    | -3.19344222868324 | 2.81363661084466  | -0.94477518979669 |
| H    | -4.50549326818526 | 2.88049623878611  | -2.14538182913516 |
| H    | -2.92570179202891 | 3.57869530158940  | -2.52842543808201 |
| C    | -3.23307271692525 | 1.31396174265990  | -4.10567884330242 |
| H    | -2.86269336728878 | 0.37020588891273  | -4.52419356079481 |
| H    | -2.75050697201503 | 2.14476130588896  | -4.63945004659595 |
| H    | -4.31322112464423 | 1.37183178099164  | -4.30087330304154 |
| O    | -1.21788494751675 | -1.81655890147071 | -3.64413088329974 |
| C    | 2.66779374740304  | 0.68649227266709  | 0.00481648055474  |
| O    | 3.79931572469439  | 1.04132580364384  | 0.35162591747381  |
| N    | 1.49481955442309  | 0.86854864867491  | 0.68683094519404  |
| C    | 1.55217627266521  | 1.46191602152307  | 1.96977643262799  |
| C    | 1.21756025180913  | 2.83697946766052  | 2.11396474565458  |
| C    | 1.27208084167460  | 3.40297820575087  | 3.39013291985904  |
| H    | 1.01141472221546  | 4.45149427837890  | 3.52408384097620  |
| C    | 1.65788307423493  | 2.65018759091758  | 4.49637900557285  |
| H    | 1.69266375858520  | 3.11176928533147  | 5.48325911164824  |
| C    | 2.00919356617727  | 1.31103202083890  | 4.34052139880224  |
| H    | 2.33680166559366  | 0.74051380970031  | 5.20999524531171  |
| C    | 1.96730184864183  | 0.68853257261779  | 3.08963565773080  |
| C    | 2.44778597458399  | -0.75122897072401 | 2.95541386368344  |
| H    | 2.21984205710481  | -1.08280615475550 | 1.93330989942529  |
| C    | 3.97680075379663  | -0.82591571887161 | 3.14219548492485  |
| H    | 4.49138430636311  | -0.14786225559021 | 2.45255307170504  |
| H    | 4.33368637660475  | -1.84944800532471 | 2.95943917578764  |
| H    | 4.25622585307644  | -0.55247536659369 | 4.16952995976432  |
| C    | 1.74634961580672  | -1.72248938747482 | 3.91961184901540  |
| H    | 2.12098772262708  | -2.74318283317937 | 3.76133698033311  |
| H    | 0.66015971031250  | -1.73496052341081 | 3.77123140682095  |
| H    | 1.94085813707197  | -1.46345026818462 | 4.96934610769531  |
| C    | 0.90416484678736  | 3.69236810904791  | 0.89633131931577  |
| H    | 0.45960534942727  | 3.02852666233600  | 0.14087187628251  |
| C    | 2.20814632839543  | 4.26705718026533  | 0.30292431178915  |
| H    | 2.94619856700236  | 3.48342827286288  | 0.09699308868059  |
| H    | 2.66537776010355  | 4.97726247397430  | 1.00647189385789  |
| H    | 1.99705666786752  | 4.80629342980655  | -0.63148521423200 |
| C    | -0.09842847833702 | 4.82127090829489  | 1.16499038371932  |
| H    | -1.01311996185548 | 4.44279823532103  | 1.63439984322616  |
| H    | -0.37168982684067 | 5.30716401515720  | 0.21843184119447  |
| H    | 0.32526563229639  | 5.60022838023008  | 1.81413038632906  |
| C    | -2.46718548683860 | 1.05615653943614  | 2.81350179214531  |
| C    | -1.70898830518214 | -0.13916471901520 | 3.37305423347079  |
| C    | -3.85341765442724 | 0.63840282141058  | 2.30743006812685  |
| H    | -1.55765047767399 | -0.86702936214802 | 2.56781558355593  |
| H    | -2.28466932339434 | -0.63153961288619 | 4.16690004660837  |

|   |                   |                   |                  |
|---|-------------------|-------------------|------------------|
| H | -0.73338798418714 | 0.16037997690226  | 3.76894773113227 |
| H | -3.76884737725784 | -0.16775283045129 | 1.57167132244639 |
| H | -4.37560666344406 | 1.48188796812992  | 1.84294516241428 |
| H | -4.45584585167411 | 0.28779570524659  | 3.15505432833977 |
| C | -2.58793563154781 | 2.23586268993301  | 3.77460122652196 |
| C | -2.21802190205537 | 2.14287416651107  | 5.12150797274086 |
| C | -3.13032433806825 | 3.44752889017715  | 3.31655719623043 |
| C | -3.29186873334116 | 4.53242255379791  | 4.17660151506597 |
| C | -2.92629575627322 | 4.42353254616613  | 5.52003707171578 |
| C | -2.39183897274625 | 3.22392121276524  | 5.98871284094923 |
| H | -1.78960097899524 | 1.22063337393913  | 5.50842421502820 |
| H | -3.42149049293013 | 3.54314443414211  | 2.27158219118898 |
| H | -3.70832898453573 | 5.46528914178536  | 3.79677275901784 |
| H | -3.05871481638797 | 5.26802465151396  | 6.19598674171839 |
| H | -2.10251409202028 | 3.12583741835383  | 7.03499196754556 |

**Table S9.** Cartesian coordinates (Å) for LCu<sup>III</sup>-OoTb (S)

| Atom | X                 | Y                 | Z                 |
|------|-------------------|-------------------|-------------------|
| C    | 2.63575524817496  | 13.81723221489649 | 10.19596110119803 |
| H    | 2.12762931854015  | 14.77062556381121 | 9.99968451211465  |
| H    | 2.41129675403895  | 13.12708062637898 | 9.37604336312273  |
| H    | 3.71742593769813  | 14.00000358417354 | 10.21348533212745 |
| C    | 2.55792473285901  | 14.15725540236785 | 12.69853919838904 |
| H    | 3.63991045792576  | 14.33872897645995 | 12.70460261328932 |
| H    | 2.26761672495773  | 13.71563518454397 | 13.65856137606099 |
| H    | 2.04959496187655  | 15.12383258887880 | 12.58981741944597 |
| C    | 0.67179559281795  | 12.94609516991449 | 11.53623537796888 |
| H    | 0.43607226699454  | 12.18689338875457 | 10.78189532203073 |
| H    | 0.10367356437858  | 13.85451769525229 | 11.29746319148308 |
| H    | 0.35537867535799  | 12.58659019409307 | 12.52142228919395 |
| Cu   | 2.25879247480538  | 9.31877738109201  | 11.16423601048653 |
| N    | 2.39405828306257  | 8.97421079187071  | 9.19735237629970  |
| O    | 2.51059386723292  | 7.19568499750670  | 7.69138729297586  |
| C    | 2.14196152982088  | 6.76654900258527  | 10.01454790837477 |
| N    | 2.06070790357783  | 7.42117057421014  | 11.17351050303972 |
| C    | 2.37025383049941  | 7.66125251516476  | 8.82655869587774  |
| C    | 2.03077301411951  | 5.37828073735814  | 9.99412021540274  |
| H    | 2.10263665042854  | 4.85940015740381  | 9.04021708670630  |
| C    | 2.64840185492585  | 9.99394613094857  | 8.26274215486092  |
| C    | 3.98797208104090  | 10.41278726364094 | 8.02861833797805  |
| C    | 4.21055335309451  | 11.43511874078559 | 7.10122233067594  |
| H    | 5.23026469970959  | 11.76393170994475 | 6.90190680665296  |
| C    | 1.56051153712593  | 10.60840125046837 | 7.57891101556629  |
| C    | 3.15439777143844  | 12.03635099738626 | 6.42350114076421  |
| H    | 3.35036522422805  | 12.83124784046893 | 5.70361809779134  |
| C    | 5.16851849202043  | 9.73540716198229  | 8.70448282131698  |
| H    | 4.76716584845621  | 9.10653120388262  | 9.51033495309465  |
| C    | 1.83514029000165  | 4.71272647275998  | 11.20863314461188 |
| H    | 1.74454828818160  | 3.62698951476334  | 11.22275651034586 |
| C    | 1.84337128405389  | 11.62174616104734 | 6.66241016205273  |
| H    | 1.02770778998962  | 12.09647315427822 | 6.11790168863040  |
| C    | 0.13138797045656  | 10.12875362801821 | 7.77842936000359  |
| H    | 0.10284621890202  | 9.59094538889869  | 8.73693136603917  |
| C    | -0.25840662940929 | 9.12610297500681  | 6.67255621475596  |
| H    | -0.27725568910383 | 9.62370303585178  | 5.69251077534016  |
| H    | -1.26069181803618 | 8.71663933847511  | 6.86256460128428  |
| H    | 0.45452860230825  | 8.29532693733978  | 6.61689071551311  |
| C    | 2.16540568299649  | 13.24814559311361 | 11.53504053592162 |
| C    | -0.89246035533628 | 11.27127061571010 | 7.85418219458935  |
| H    | -0.99580520018379 | 11.79310905679413 | 6.89303629413524  |
| H    | -0.61919794215630 | 12.01491120395357 | 8.61327503166470  |
| H    | -1.88243497292440 | 10.87049605002416 | 8.11081667021266  |
| C    | 6.14009660283010  | 10.73671032310742 | 9.34780816548979  |
| H    | 6.62639157762225  | 11.37478194678137 | 8.59711330331417  |
| H    | 6.93565501327014  | 10.19916125955342 | 9.88195012600979  |
| H    | 5.62055091554966  | 11.38344036859734 | 10.06488918855776 |
| C    | 5.89786393912425  | 8.80877538678057  | 7.71152140709772  |
| H    | 6.34253666721888  | 9.38773032645462  | 6.88980106071112  |
| H    | 5.21008639692413  | 8.07418255329886  | 7.27519581322625  |
| H    | 6.70915886983336  | 8.26804289136971  | 8.21890079051828  |
| O    | 2.76375711650820  | 11.06809051425336 | 10.80592005409117 |
| O    | 2.93525594408053  | 12.01648403410616 | 11.82835234021182 |
| N    | 1.93490124193217  | 9.07314603520251  | 13.11778656328019 |
| O    | 1.6534240386232   | 7.34162466223783  | 14.65980285135312 |
| C    | 1.87655611615155  | 6.81939684871169  | 12.34690813483336 |
| C    | 1.80965913254422  | 7.76767729772069  | 13.51061011703289 |
| C    | 1.75669729198472  | 5.43247153523874  | 12.40496707856543 |
| H    | 1.60710176071860  | 4.95809357009755  | 13.37281815268517 |
| C    | 1.80842970278819  | 10.08058668354665 | 14.10421422599662 |
| C    | 0.51610339751275  | 10.47286648342171 | 14.55232859481789 |
| C    | 0.43093790821498  | 11.46440555088519 | 15.53438830015385 |
| H    | -0.54926759592637 | 11.77101432250585 | 15.89988418396411 |
| C    | 2.98114051794538  | 10.66423952902735 | 14.65715316544429 |
| C    | 1.57369088662973  | 12.05060320666106 | 16.07437762330975 |
| H    | 1.48137863383633  | 12.81774423610441 | 16.84354743802355 |
| C    | -0.75602336031313 | 9.78362302410193  | 14.07420891855310 |
| H    | -0.48767797187012 | 9.15330717708872  | 13.21548342339128 |
| C    | 2.83434917994932  | 11.64615067047995 | 15.64082246056657 |
| H    | 3.72099355185604  | 12.10067523214857 | 16.08091739861699 |
| C    | 4.36314276725630  | 10.16861771296843 | 14.26092023980184 |
| H    | 4.27514510056041  | 9.73772801429765  | 13.25365021392280 |
| C    | 4.81261463309060  | 9.03990532033210  | 15.21225081226633 |
| H    | 4.95600462495878  | 9.43077469603556  | 16.22966559588576 |

|   |                   |                   |                   |
|---|-------------------|-------------------|-------------------|
| H | 5.76875741515737  | 8.61407900617869  | 14.87635366810641 |
| H | 4.06999491408857  | 8.23523056525317  | 15.26660274697656 |
| C | 5.42586781359514  | 11.27355849206181 | 14.19513457812611 |
| H | 5.64790394638326  | 11.69165524063097 | 15.18673223974987 |
| H | 5.11111231780550  | 12.09037383110732 | 13.53560320248461 |
| H | 6.36579573473698  | 10.86154445176386 | 13.8055330961658  |
| C | -1.84649323143164 | 10.76030629348767 | 13.60440193170252 |
| H | -2.18248070089278 | 11.41780228949407 | 14.41775635070865 |
| H | -2.72480677535960 | 10.19969211801115 | 13.25606870595242 |
| H | -1.50249331863177 | 11.39403190546427 | 12.77861589400994 |
| C | -1.30924931365805 | 8.85936494499760  | 15.17846430786652 |
| H | -1.64246555713017 | 9.44732540473390  | 16.04541115060769 |
| H | -0.54707110281938 | 8.14861101912316  | 15.51631305852556 |
| H | -2.17471127943495 | 8.29430485231522  | 14.80424700448335 |

**Table S10.** Cartesian coordinates (Å) for LCu<sup>III</sup>-OOCm (T)

| Atom | X                 | Y                 | Z                 |
|------|-------------------|-------------------|-------------------|
| Cu   | 0.04932526425993  | 0.01919846331065  | -0.00410422824864 |
| O    | -0.96192223273794 | -0.05204108108667 | 1.63744243487470  |
| O    | -1.76589378130259 | 1.02247910291181  | 1.88109330598892  |
| N    | 1.21048966729214  | -0.23629598120468 | -1.56299304693852 |
| C    | 2.51304293137540  | 0.00851189046552  | -1.42600135387577 |
| C    | 3.37635803545336  | -0.18683933245181 | -2.50311326986090 |
| H    | 4.43717783780297  | 0.01696496449364  | -2.37231010761279 |
| C    | 2.83255049380364  | -0.63302490527943 | -3.71167523111578 |
| H    | 3.48254428590823  | -0.79441373952278 | -4.57135655727422 |
| C    | 1.45833752102639  | -0.86424137286640 | -3.82623854141357 |
| H    | 0.99049912271030  | -1.19760697488284 | -4.75032212276569 |
| C    | 0.65983261608285  | -0.64884140743456 | -2.70374907883823 |
| C    | -0.83825243819827 | -0.80786361061044 | -2.65018895397616 |
| N    | -1.34136399915308 | -0.54308736828837 | -1.41380974413691 |
| C    | -2.74104786922321 | -0.55287064484881 | -1.21572745236093 |
| C    | -3.51888591187596 | 0.57617866292866  | -1.58873951372418 |
| C    | -4.89648618932155 | 0.54539738867280  | -1.34482357497448 |
| H    | -5.50879471965922 | 1.39889844165786  | -1.63775691881741 |
| C    | -5.50180488760856 | -0.55671317521938 | -0.74717557277217 |
| H    | -6.57691263403339 | -0.56002903202734 | -0.56642334623651 |
| C    | -4.73059346156215 | -1.66460110589710 | -0.39247071061751 |
| H    | -5.21766336469500 | -2.52939036910558 | 0.05673190485024  |
| C    | -3.35270545506236 | -1.69134208710304 | -0.62054488716065 |
| C    | -2.5356689169357  | -2.93948500742108 | -0.32237219832126 |
| H    | -1.50524151046869 | -2.60790720615580 | -0.12493246748359 |
| C    | -3.01571098397783 | -3.72891575531221 | 0.90249527275062  |
| H    | -3.09251841389441 | -3.09527751065582 | 1.79463624715398  |
| H    | -2.30955759889637 | -4.54077630243142 | 1.12272149490780  |
| H    | -3.99595738497797 | -4.19519865549221 | 0.73217834214874  |
| C    | -2.49256612527039 | -3.85571740841850 | -1.56360368799865 |
| H    | -2.14866460657763 | -3.31673954670875 | -2.45379496290859 |
| H    | -3.49553772405878 | -4.25105428536389 | -1.77897525510468 |
| H    | -1.82254111814941 | -4.70928393822464 | -1.38791839007812 |
| C    | -2.90596242888331 | 1.78204353469672  | -2.28516576925073 |
| H    | -1.81612551408582 | 1.64730883158404  | -2.27504728571396 |
| C    | -3.20971648963241 | 3.10413023992489  | -1.56152861754905 |
| H    | -2.87077895152806 | 3.08164319440787  | -0.51837403510568 |
| H    | -4.28536432800100 | 3.32865695127667  | -1.56135657042999 |
| H    | -2.70242041864008 | 3.93712385540182  | -2.06753324859738 |
| C    | -3.35105852718325 | 1.84365225553504  | -3.75895056765756 |
| H    | -3.10573533280790 | 0.91134026376840  | -4.28073340438813 |
| H    | -2.84975308563045 | 2.67463717031791  | -4.27499535652761 |
| H    | -4.43536190213145 | 2.00731752344215  | -3.83599795877629 |
| O    | -1.46556684564501 | -1.14309324802682 | -3.66444252772891 |
| C    | 2.91106361033806  | 0.51549889511516  | -0.06297282251833 |
| O    | 4.09721155446596  | 0.77524533266866  | 0.18343709492440  |
| N    | 1.84449858468120  | 0.64423510991511  | 0.77086294121383  |
| C    | 2.05941454491608  | 1.13610451471569  | 2.08380402483060  |
| C    | 1.87211731643676  | 2.51834114620270  | 2.34821865946676  |
| C    | 2.07792635970293  | 2.98238442890398  | 3.65202154947306  |
| H    | 1.95089308789654  | 4.04303320029634  | 3.86887915613526  |
| C    | 2.45625377227150  | 2.11708753190958  | 4.67624364508496  |
| H    | 2.61800812005339  | 2.49966400456118  | 5.68420511892444  |
| C    | 2.63599203003496  | 0.76260259783041  | 4.40499902071235  |
| H    | 2.94566798117344  | 0.09348950628754  | 5.20855776398847  |
| C    | 2.44333298373022  | 0.24608733885235  | 3.11949789975614  |
| C    | 2.69747914741271  | -1.23067783578207 | 2.85393227271675  |
| H    | 2.38231860813394  | -1.43462496426046 | 1.82171105297349  |
| C    | 4.20039335751880  | -1.55406670632779 | 2.94959121272325  |
| H    | 4.78033395462457  | -0.91643407135226 | 2.27195130524857  |
| H    | 4.38526231628402  | -2.60454838210134 | 2.68379443974749  |
| H    | 4.57316702509736  | -1.39648449961190 | 3.97166892514996  |
| C    | 1.87521325890278  | -2.14732817105827 | 3.77457357545979  |
| H    | 2.05225655626858  | -3.20133227050816 | 3.51932766683714  |
| H    | 0.79912819295454  | -1.95235411583146 | 3.67731780858326  |
| H    | 2.14884959793159  | -2.01497192882694 | 4.83039039925695  |
| C    | 1.52960704406318  | 3.49472921559350  | 1.23253325524299  |
| H    | 1.13331823865905  | 2.90151342282617  | 0.39604360927673  |
| C    | 2.80458471201029  | 4.20180655469299  | 0.73034510841996  |
| H    | 3.56981973653207  | 3.47629577255945  | 0.42940303643174  |
| H    | 3.23239823966689  | 4.83392419662433  | 1.52155646809172  |
| H    | 2.57496476927796  | 4.84661728548025  | -0.12987407543109 |
| C    | 0.45392032644401  | 4.51902115080053  | 1.62287691434624  |
| H    | -0.45881054625434 | 4.02954979377520  | 1.98579798079187  |
| H    | 0.18537909815072  | 5.13246650248076  | 0.75199647300653  |
| H    | 0.80527599616354  | 5.20606788563260  | 2.40499029129561  |

|   |                   |                   |                  |
|---|-------------------|-------------------|------------------|
| C | -2.41909063295543 | 0.92973932367536  | 3.25409321566801 |
| C | -1.30366613445856 | 0.98819046913421  | 4.28829170987597 |
| C | -3.18778811654650 | -0.38806664632644 | 3.33556541739205 |
| H | -0.63082708479337 | 0.13653695542609  | 4.14845741867248 |
| H | -1.72805591888100 | 0.92485214905905  | 5.29787341517726 |
| H | -0.71365351341296 | 1.90687240437708  | 4.20437767114375 |
| H | -2.49448458588037 | -1.23482714430779 | 3.28723312398955 |
| H | -3.92050298222654 | -0.47776205151847 | 2.52676108592641 |
| H | -3.72217949057142 | -0.42584714752021 | 4.29281231616531 |
| C | -3.35120367617058 | 2.13262515068774  | 3.23965259250305 |
| C | -3.27912328378801 | 3.13487507109500  | 4.21595118545346 |
| C | -4.33118380234233 | 2.23950528979202  | 2.23978754129150 |
| C | -5.21240942717339 | 3.31917284138346  | 2.21930468604784 |
| C | -5.13894785515660 | 4.30642551720162  | 3.20397160754106 |
| C | -4.17041957367977 | 4.20961402057818  | 4.20253710453827 |
| H | -2.52783012366930 | 3.08242162694881  | 5.00120223194578 |
| H | -4.39962377835881 | 1.48137949790111  | 1.46031271362286 |
| H | -5.96096659268916 | 3.38732784051240  | 1.43048182847258 |
| H | -5.83190631804598 | 5.14726340372062  | 3.19116714645699 |
| H | -4.10134133389130 | 4.97532730336018  | 4.97477172962099 |

**Table S11.** Cartesian coordinates (Å) for LCu<sup>III</sup>-OOtBu (T)

| Atom | X                 | Y                  | Z                 |
|------|-------------------|--------------------|-------------------|
| C    | 3.39368382795029  | 13.71158960485348  | 12.27241903099135 |
| H    | 3.64893010475102  | 14.77874178546255  | 12.25408189629715 |
| H    | 4.23496300688349  | 13.14999897322647  | 11.85245150058742 |
| H    | 3.24419022046014  | 13.40602760655565  | 13.31465497293083 |
| C    | 0.92135133500528  | 14.20592876628754  | 12.04699465889488 |
| H    | 0.77238850516166  | 13.92598340280203  | 13.09635539351060 |
| H    | 0.00894690671033  | 13.97951340808151  | 11.48214859198091 |
| H    | 1.09178110134841  | 15.28857815292105  | 11.99774732107483 |
| C    | 2.31862956748468  | 13.79278903700685  | 9.97232001919224  |
| H    | 3.12074401199351  | 13.18218054505615  | 9.54465011374439  |
| H    | 2.58623328603147  | 14.85075372569334  | 9.85421689892840  |
| H    | 1.39856423775043  | 13.60339268162332  | 9.40739493275842  |
| Cu   | 2.30418157338916  | 9.32649486982165   | 11.22067639858639 |
| N    | 2.38875205736863  | 8.95178120310559   | 9.21319460100747  |
| O    | 2.49899947931852  | 7.15974869122345   | 7.72664796576491  |
| C    | 2.36604564959528  | 6.72923678886074   | 10.07123637538052 |
| N    | 2.28630309964273  | 7.36879211355127   | 11.23746406770297 |
| C    | 2.42768615000200  | 7.63777322007322   | 8.86735135581201  |
| C    | 2.36782298014667  | 5.33550621180191   | 10.04108922700215 |
| H    | 2.43344566636186  | 4.82762714223065   | 9.08099971263708  |
| C    | 2.41652408495427  | 9.93965359946345   | 8.19481797524219  |
| C    | 3.66115699487795  | 10.44973312607613  | 7.74386119658554  |
| C    | 3.65745590008841  | 11.44774896277363  | 6.76402169414099  |
| H    | 4.60630498478439  | 11.84092805594129  | 6.39782836610570  |
| C    | 1.19737486163543  | 10.43029255257225  | 7.66118826512409  |
| C    | 2.46601046472023  | 11.93949017104832  | 6.23502192657266  |
| H    | 2.48592180770540  | 12.71453035229529  | 5.46869064237563  |
| C    | 4.98195897101354  | 9.89695296711356   | 8.25899202845164  |
| H    | 4.75207628271349  | 9.26732298454427   | 9.12951988732885  |
| C    | 2.28150217364193  | 4.65006812418908   | 11.25712792074476 |
| H    | 2.28210112141284  | 3.56030874227709   | 11.26524654630964 |
| C    | 1.25021253870301  | 11.428948404570031 | 6.68279186053689  |
| H    | 0.32162009882248  | 11.80791943876959  | 6.25496378642839  |
| C    | -0.14583704249735 | 9.85507896383943   | 8.08592108596818  |
| H    | 0.03374051283601  | 9.23551670019106   | 8.97550440256953  |
| C    | -0.71150880856293 | 8.93211462583067   | 6.98926279629149  |
| H    | -0.93323679920257 | 9.50145165058959   | 6.07539262184538  |
| H    | -1.64496300242805 | 8.45934816901590   | 7.32634331615450  |
| H    | 0.00490052632155  | 8.14301847866838   | 6.73116652327953  |
| C    | 2.12782600960846  | 13.48667990041643  | 11.45352874628808 |
| C    | -1.16554643441060 | 10.93677099008226  | 8.47627088417596  |
| H    | -1.43033535294936 | 11.57608525934180  | 7.62298485395488  |
| H    | -0.77846606278369 | 11.58278748121436  | 9.27509284236982  |
| H    | -2.09385962577560 | 10.47195853493697  | 8.83598081312856  |
| C    | 5.94834117793622  | 10.99557943259823  | 8.72895309537430  |
| H    | 6.26221840091116  | 11.64578169070820  | 7.90085907879157  |
| H    | 6.85679384099231  | 10.54614056357563  | 9.15318455210770  |
| H    | 5.49045056557686  | 11.62821537451842  | 9.50048861930046  |
| C    | 5.64337838388981  | 8.99425862993933   | 7.19973700084857  |
| H    | 5.92026638588168  | 9.57530600197463   | 6.30853825343859  |
| H    | 4.96239421827217  | 8.19408499664357   | 6.88607464559785  |
| H    | 6.55889416704161  | 8.53650370984160   | 7.60066415367671  |
| O    | 2.70748802257815  | 11.20594371437227  | 11.15434154582643 |
| O    | 1.72116425692174  | 12.04190873579811  | 11.58627195650675 |
| N    | 2.03283802607148  | 8.97917970319247   | 13.23107427119847 |
| O    | 1.99545904314591  | 7.20350255770985   | 14.74488192568144 |
| C    | 2.18979666892124  | 6.74674211201487   | 12.41176825095725 |
| C    | 2.07174097218311  | 7.66976031653235   | 13.59989564995329 |
| C    | 2.18779903163791  | 5.35333297317158   | 12.46222689268801 |
| H    | 2.11089214157214  | 4.85978062264100   | 13.42887419647493 |
| C    | 1.93943641616961  | 9.98550527811923   | 14.21724834038158 |
| C    | 0.67385927366910  | 10.58739470398748  | 14.47102231678164 |
| C    | 0.59938969301175  | 11.61349931072999  | 15.41802407057594 |
| H    | -0.36272385726046 | 12.07834750277461  | 15.63105676654006 |
| C    | 3.09624902531735  | 10.40814971118868  | 14.92430021765393 |
| C    | 1.73195662378753  | 12.04232046787639  | 16.10721554593019 |
| H    | 1.65339745840530  | 12.84103888569981  | 16.84506487767328 |
| C    | -0.58244494002567 | 10.05690285891844  | 13.79831486823259 |
| H    | -0.26863909331075 | 9.59853434198181   | 12.84903827619908 |
| C    | 2.96379333801781  | 11.43740342885299  | 15.86095982350712 |



|   |                   |                   |                   |
|---|-------------------|-------------------|-------------------|
| H | 3.84084156587542  | 11.76698068660345 | 16.41903854700335 |
| C | 4.44998977304604  | 9.74358520602403  | 14.72157799285748 |
| H | 4.34930706680145  | 9.04598137956081  | 13.87947631838609 |
| C | 4.84350871613956  | 8.91870409642588  | 15.96169871809662 |
| H | 4.98911886911692  | 9.56806822837266  | 16.83661931297799 |
| H | 5.78617747952404  | 8.38284184595427  | 15.78190551590297 |
| H | 4.06655373710618  | 8.18393300799640  | 16.20278032320752 |
| C | 5.55419895571474  | 10.74834163380401 | 14.35370940837204 |
| H | 5.72628500303747  | 11.47602322383682 | 15.15874872946702 |
| H | 5.30222677990634  | 11.30619705614319 | 13.44302623160589 |
| H | 6.50278015888949  | 10.22233920383914 | 14.17850500799813 |
| C | -1.62437671274980 | 11.13506760240173 | 13.47313649495692 |
| H | -2.06408560722180 | 11.57051711186667 | 14.38101335633692 |
| H | -2.44953520670235 | 10.69467161955254 | 12.89730609297803 |
| H | -1.19335737392273 | 11.94967717958833 | 12.87844402274489 |
| C | -1.21135004638158 | 8.94121367268649  | 14.65939414448874 |
| H | -1.57975482636917 | 9.35387038314894  | 15.60942270407305 |
| H | -0.48478913838241 | 8.15495715615001  | 14.89569075565781 |
| H | -2.06338540712766 | 8.48557627355322  | 14.13514111423255 |

## References

- (1) Wasilke, J.-C.; Wu, G.; Bu, X.; Kehr, G.; Erker, G. *Organometallics*. **2005**, *24*, 4289- 4297.
- (2) Donoghue, P. J.; Tehrani, J.; Cramer, C. J.; Sarangi, R.; Solomon, E. I.; Tolman, W. B. *J. Am. Chem. Soc.* **2011**, *133*, 17602-17605.
- (3) Le Bras, J.; Jiao, H.; Meyer, W. E.; Hampel, F.; Gladysz, J. A. *J. of Organomet. Chem.* **2000**, *616*, 54-66.
- (4) Seim, K. L.; Obermeyer, A. C.; Francis, M. B. *J. Am. Chem. Soc.* **2011**, *133*, 16970-16976.
- (5) Mader, E. A.; Davidson, E. R.; Mayer, J. M. *J. Am. Chem. Soc.* **2007**, *129*, 5153-5166.
- (6) Finn, M. G.; Sharpless, K. B. *J. Am. Chem. Soc.* **1991**, *113*, 113-126.
- (7) Stoll, S.; Schweiger, A. *J. Magn. Reson.* **2006**, *178*, 42-55.
- (8) Noviadri, I.; Brown, K. N.; Fleming, D. S.; Gulyas, P. T.; Lay, P. A.; Masters, A. F.; Phillips, L. *J. Phys. Chem. B.* **1999**, *103*, 6713-6722.
- (9) Harris, D. C.; Bertolucci, M. D. In *Symmetry and Spectroscopy: An Introduction to Vibrational and Electronic Spectroscopy*, Dover Publications: New York, NY, 1989; pp 93-224.
- (10) Neese, F., *Wiley Interdiscip. Rev. Comput. Mol. Sci.* **2012**, *2*, 73-78.
- (11) (a) Perdew, J. P.; Wang, Y., *Phys. Rev. B* **1992**, *45*, 13244-13249. (b) Burke, K.; Perdew, J. P.; Wang, Y. In *Electronic Density Functional Theory: Recent Progress and New Directions*, Dobson, J. F.; Vignale, G.; Das, M. P., Eds. Springer US: Plenum, NY, **1998**; 81-111. (c) Adamo, C.; Barone, V., *J. Chem. Phys* **1998**, *108*, 664-675.

- (12) (a) Schafer, A.; Horn, H.; Ahlrichs, R. *J. Chem. Phys.* **1992**, *97*, 2571-2577. (b) Weigend, F.; Ahlrichs, R., *PCCP* **2005**, *7*, 3297-3305.
- (13) Neese, F. *J. Comput. Chem.* **2003**, *24*, 1740-1747.
- (14) Spaeth, A. D.; Gagnon, N. L.; Dhar, D.; Yee, G. M.; Tolman, W. B. *J. Am. Chem. Soc.* **2017**, *139*, 4477-4485.
- (15) (a) Becke, A. D. *J. Chem. Phys.* **1986**, *84*, 4524-4529. (b) Perdew, J. P. *Phys. Rev. B* **1986**, *33*, 8822-8824.
- (16) (a) Partridge, H. *J. Chem. Phys.* **1987**, *87*, 6643-6647. (b) Partridge, H. *J. Chem. Phys.* **1989**, *90*, 1043-1047.
- (17) Dhar, D.; Yee, G. M.; Spaeth, A. D.; Boyce, D. W.; Zhang, H.; Deregi, B.; Cramer, C. J.; Tolman, W. B., *J. Am. Chem. Soc.* **2016**, *138*, 356-368.
- (18) Handy, N. C.; Cohen, A. J., *Mol. Phys.* **2001**, *99*, 403-412.
- (19) Tao, J.; Perdew, J. P.; Staroverov, V. N.; Scuseria, G. E., *Phys. Rev. Lett.* **2003**, *91*, 146401.
- (20) (a) Zhao, Y.; Truhlar, D. G., *J. Chem. Phys.* **2006**, *125*, 194101. (b) Ekström, U.; Visscher, L.; Bast, R.; Thorvaldsen, A. J.; Ruud, K., *J. Chem. Theory Comput.* **2010**, *6*, 1971-1980.
- (21) (a) Becke, A. D., *Physical Review A* **1988**, *38*, 3098-3100. (b) Lee, C.; Yang, W.; Parr, R. G., *Phys. Rev. B* **1988**, *37*, 785-789. (c) Becke, A. D., *J. Chem. Phys.* **1993**, *98*, 5648-5652.
- (22) Adamo, C.; Barone, V., *J. Chem. Phys.* **1999**, *110*, 6158-6170.
- (23) (a) Staroverov, V. N.; Scuseria, G. E.; Tao, J.; Perdew, J. P., *J. Chem. Phys.* **2003**, *119*, 12129-12137. (b) Staroverov, V. N.; Scuseria, G. E.; Tao, J.; Perdew, J. P., *J. Chem. Phys.* **2004**, *121*, 11507-11507.
- (24) (a) Zhao, Y.; Truhlar, D. G., *Theor. Chem. Acc.* **2008**, *120*, 215-241. (b) Ekström, U.; Visscher, L.; Bast, R.; Thorvaldsen, A. J.; Ruud, K., *J. Chem. Theory Comput.* **2010**, *6*, 1971-1980.
- (25) Zhao, Y.; Truhlar, D. G., *J. Phys. Chem. A*, **2005**, *109*, 5656-5667.
- (26) Izsák, R.; Neese, F., *J. Chem. Phys.* **2011**, *135*, 144105.
- (27) (a) Goerigk, L.; Grimme, S., *J. Chem. Theory Comput.* **2011**, *7*, 291-309. (b) Goerigk, L.; Grimme, S., *PCCP* **2011**, *13*, 6670-6688.

- (28) (a) Noodleman, L., *J. Chem. Phys.* **1981**, *74*, 5737-5743. (b) Ciofini, I.; Daul, C. A., *Coord. Chem. Rev.* **2003**, *238–239*, 187-209. (c) Cramer, C. J.; Truhlar, D. G., *PCCP* **2009**, *11*, 10757-10816. (d) Donoghue, P. J.; Gupta, A. K.; Boyce, D. W.; Cramer, C. J.; Tolman, W. B., *J. Am. Chem. Soc.* **2010**, *132*, 15869-15871.
- (29) Pantazis, D. A.; Chen, X. Y.; Landis, C. R.; Neese, F. *J. Chem. Theory Comput.* **2008**, *4*, 908-919.
- (30) (a) Hirata, S.; Head-Gordon, M., *Chem. Phys. Lett.* **1999**, *302*, 375-382. (b) Hirata, S.; Head-Gordon, M., *Chem. Phys. Lett.* **1999**, *314*, 291-299.
- (31) Portmann, S.; Lüthi, H. P., *CHIMIA Int. J. Chem.* **2000**, *54*, 766-770.
- (32) (a) Avogadro: an open-source molecular builder and visualization tool. Version 1.2.0. <http://avogadro.cc/> (b) Hanwell, M. D.; Curtis, D. E.; Lonie, D. C.; Vandermeersch, T.; Zurek, E.; Hutchison, G. R. *J. Cheminform.* **2012**, *4*, 17.
- (33) Allouche, A. R. *J. Comput. Chem.* **2011**, *32*, 174–182.
- (34) Yang, L.; Powell, D. R.; Houser, R. P. *Dalton Trans.* **2007**, *9*, 955–964.
- (35) (a) Brown, I. D.; Altermatt, D. *Acta Crystallogr., Sect. B: Struct. Sci.* **1985**, *41*, 244–247. (b) Liu, W.; Thorp, H. H. *Inorg. Chem.* **1993**, *32*, 4102–4105. (c) Shields, G. P.; Raithby, P. R.; Allen, F. H.; Motherwell, W. D. S. *Acta Crystallogr., Sect. B: Struct. Sci.* **2000**, *56*, 455–465. (d) Mahapatra, S.; Halfen, J. A.; Wilkinson, E. C.; Pan, G.; Wang, X.; Young, V. G.; Cramer, C. J.; Que, L., Jr.; Tolman, W. B. *J. Am. Chem. Soc.* **1996**, *118*, 11555–11574.
